# Supplementary material
Source: ML conference proceedings conference paper supplement (https://openreview.net/forum?id=e0HQiao2F0)
Supplement: supplementary_material [file Mix-sample_SGD_ALL.pdf › Mix-sample_SGD_ALL.pdf]

---

# Mixed-Sample SGD: an End-to-end Analysis of Supervised Transfer Learning

---

Anonymous Author(s)

Affiliation

Address

email

## Abstract

Theoretical works on supervised transfer learning (STL)—where the learner has access to labeled samples from both source and target distributions—have for the most part focused on statistical aspects of the problem, while efficient optimization has received less attention. We consider the problem of designing an SGD procedure for STL that alternates sampling between source and target data, while maintaining statistical transfer guarantees without prior knowledge of the quality of the source data. A main algorithmic difficulty is in understanding how to design such an adaptive sub-sampling mechanism at each SGD step, to automatically gain from the source when it is informative, or bias towards the target and avoid negative transfer when the source is less informative.

We show that, such a mixed-sample SGD procedure is feasible for general prediction tasks with convex losses, rooted in tracking an abstract sequence of constrained convex programs that serve to maintain the desired transfer guarantees. We instantiate these results in the concrete setting of linear regression with square loss, and show that the procedure converges, with  $1/\sqrt{T}$  rate, to a solution whose statistical performance on the target is adaptive to the a priori unknown quality of the source. Experiments with synthetic and real datasets support the theory.

## 1 Introduction

In supervised transfer learning (STL), some amount of target data is to be complemented by a usually larger amount of related *source* data towards training a predictor. A characteristic problem to be solved is whether and how much to bias towards the source or target data without prior knowledge of the predictive quality of the source data for the target task. Many recent theoretical works on STL have yielded important insights into general approaches that may guarantee good target performance. Our main aim in this work is to understand the extent to which such insights may be incorporated into actual efficient procedures, in particular, practical *stochastic gradient descent* (SGD) type procedures, while maintaining good statistical guarantees for transfer.

For background, theoretical approaches for STL often take the form of penalized or constrained risk minimization—e.g., minimizing empirical risk on source subject to low target risk, or vice versa—or more generally, some type of weighted risk minimization that aims to favor either source or target data, whichever is most beneficial (which is not usually known a priori). For example, let  $P$  and  $Q$  denote source and target distributions respectively, a typical approach, say in linear regression, would be to consider a weighted objective of the form<sup>1</sup>  $\hat{R}_P(\theta) + \lambda \hat{R}_Q(\theta)$  and solve for choice  $\lambda^*$  so that  $\theta^* = \theta^*(\lambda^*)$  has small target risk  $R_Q(\theta)$ .

---

<sup>1</sup>Equivalently, of the form  $\alpha \hat{R}_P(\theta) + (1 - \alpha) \hat{R}_Q(\theta)$  for  $\alpha \in [0, 1]$ ,  $\alpha = 1 - \lambda/(1 + \lambda)$ .

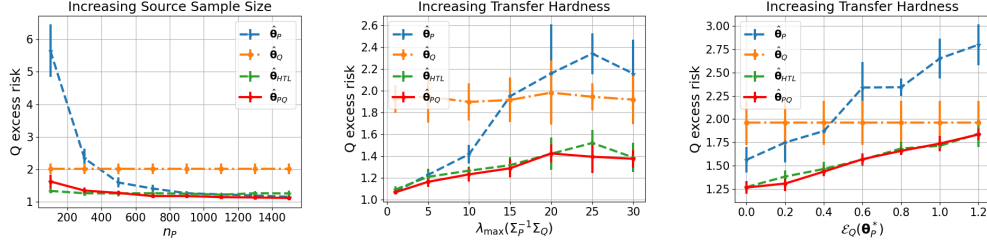

Figure 1: Simulation Results with Gaussian data, illustrating our guarantees that  $\mathcal{E}(\hat{\theta}_{PQ}) < \min\{\mathcal{E}(\hat{\theta}_P), \mathcal{E}(\hat{\theta}_Q)\}$ .  $\hat{\theta}_{HTL}$  denotes the Hypothesis Transfer Learning (HTL). (Left) we fix  $P, Q$  while increasing  $n_P$ , or (Middle) and (Right) we fix  $n_P$ , and push  $P$  far from  $Q$  as controlled by  $\lambda_{\max}(\Sigma_P^{-1}\Sigma_Q)$  and  $\mathcal{E}_Q(\theta_P^*)$ . The source is least informative, i.e. source ERM  $\hat{\theta}_P$  is worse than target ERM  $\hat{\theta}_Q$ , when either  $n_P$  is too small (Left), or as  $\lambda_{\max}(\Sigma_P^{-1}\Sigma_Q)$  or  $\mathcal{E}_Q(\theta_P^*)$  is large (Middle and Right); we see that our method  $\hat{\theta}_{PQ}$  automatically adapts to either situations and avoids negative transfer. HTL  $\hat{\theta}_{HTL}$  yields results comparable to our method but it needs expensive cross-validation process to choose a proper bias parameter.

While many positive results have been derived over the years, they typically concern the target risk of the solution, upon a good choice of weights (i.e.,  $\lambda^*$ ), but do not address the computational aspects of the problem. For instance, choosing  $\lambda$  (or any similar bias parameter) by cross-validation on the data (target and or source data) can be expensive as it involves many optimization passes over the combined data. Constrained risk minimization approaches, e.g., of the form  $\min \hat{R}_P(\theta)$  s.t.  $\hat{R}_Q(\theta) \lesssim \epsilon$  can similarly be expensive in maintaining the constraint (typically via expensive projection steps) through optimization iterations. This leaves open the extent to which such solutions may be achieved efficiently while at the same time maintaining strong statistical guarantees on target risk, adaptively to whether source or target datasets happen to be most informative for the target task.

We initiate the study of these questions in the context prediction tasks with convex losses, and propose a variant of SGD that alternates between sampling the source and target data at a sampling rate that changes according to a parameter  $\lambda_t$  that automatically tracks the predictive quality of the source data. That is, for each SGD step  $\theta_{t+1} = \theta_t - \eta \nabla \bar{R}(\theta_t; \lambda_t)$ , the stochastic gradient estimates the gradient of an averaged empirical risk  $\bar{R}(\theta; \lambda_t) \equiv \hat{R}_P(\theta) + \lambda_t \hat{R}_Q(\theta)$  depending on  $\lambda_t$ . Our main insight into the iterative choices of  $\lambda_t$ , evident in the analysis, is to let the stochastic gradient steps effectively track a sequence of convex constrained objectives (or CP for convex program) of the form

$$\min_{\theta} \hat{R}_P(\theta) \text{ s.t. } \hat{R}_Q(\theta) \leq \hat{R}_Q(\theta_{Q,t}) + \text{slack}, \quad (1)$$

where  $\theta_{Q,t} \xrightarrow{t \rightarrow \infty} \hat{\theta}_Q \doteq \arg \min_{\theta} \hat{R}_Q(\theta)$ , i.e.,  $\theta_{Q,t}$  estimates the  $Q$ -ERM  $\hat{\theta}_Q$  in parallel. The adaptive choice of sampling rate  $\lambda_t$  is then chosen to track the sequence of max-min solutions of the corresponding Lagrangians  $\mathcal{L}_t(\lambda, \theta) \approx \bar{R}(\theta, \lambda) - \lambda \cdot (\hat{R}_Q(\theta_{Q,t}) + \text{slack})$ .

On one hand, such a mixed-sample SGD solution replaces expensive cross-validation for the choice of bias parameter with the iterative choices of  $\lambda_t$ , and also avoids costly projections onto constraint sets. On the statistical side, we can show that the solution  $\tilde{\theta}_{P,Q}$  of the limiting CP—i.e., replacing  $\theta_{Q,t}$  in (1) with its limit  $\hat{\theta}_Q$ —achieve near optimal statistical guarantees for transfer whenever the setting, including loss functions, admit certain uniform concentration guarantees on empirical risk measures. Such statistical transfer guarantees are then shown to be inherited by the mixed-sample SGD solution  $\hat{\theta}_{P,Q}$  which converges in risk to  $\tilde{\theta}_{P,Q}$  at a typical rate of  $O(1/\sqrt{t})$ .

The main difficulty in the analysis is in showing convergence in  $\hat{R}_P$  of  $\hat{\theta}_{P,Q}$  to  $\tilde{\theta}_{P,Q}$ , while the statistical analysis of  $\tilde{\theta}_{P,Q}$  combines insights from recent works on STL with either constrained or penalized objectives [1, 2, 3, 4, 5]. For intuition on technical difficulties, we note that recent classical works on SGD for CP's [6] rely heavily on the assumption that constraint sets are bounded, in order to at least approximately maintain constraints at each iteration via cheaper projections onto  $\ell_2$  balls. We have to proceed differently as we consider general convex settings with potentially unbounded constraint sets (e.g., linear regression with non-invertible covariance in over-parametrized regimes). Our analysis instead relies on carefully tracking how far iterates  $\theta_t$  may deviate from the constraint set, given the deviation of the first iterate and the internal variance of stochastic steps. Furthermore,

such control on the deviation of iterates is further complicated by the fact that, unlike in classical results such as [6], we are dealing with an evolving sequence of constraint sets given in terms of  $\theta_{Q,t}$  which is being computed by a parallel SGD.

For the sake of presentation, we will focus on the concrete case of linear regression with square loss in the main paper, while the analysis for general losses, including surrogate losses for classification, is given in the appendix where we present the generalization guarantee for general convex losses in terms of Rademacher complexity. In the case of linear regression covered in the main text, the guarantees are immediately interpretable. Statistical guarantees take the form

$$R_Q(\hat{\theta}_{P,Q}) \lesssim R_Q(\theta_Q^*) + \min\{\epsilon_Q, \tilde{\epsilon}_P\},$$

where  $\epsilon_Q, \tilde{\epsilon}_P$  are respectively, the best rate achievable by using the  $Q$  data alone, and the best transfer rate achievable by using the  $P$  data alone. In other words, the mixed-samples SGD solution is guaranteed to automatically bias towards whichever of the two samples is most predictive.

Many experimental results supporting these claims are presented in the main paper.

**Further Background.** The goal of reweighing source data relative to target data is rooted in early works on transfer learning and domain adaptation [see, e.g., 7, 8, 9, 10]. A main idea there is to find a weighting of the data that minimizes some notion of discrepancy between weighted source and target data. The actual target risk of the solution remains opaque in much of this line of work, as the theoretical analysis instead focuses on the well-posedness of the chosen notion of discrepancy and its estimability from data.

A different line of work, mostly focused on *covariate-shift settings* directly weighs source target data with estimated density ratios  $dQ_X/dP_X$  and results in rates depending on the accuracy of such estimates in situations where the density ratio is well-defined [see, e.g., 11, 12].

More closely related, and often considering linear regression settings, the approach of *hypothesis transfer* aims to bias regression towards the solution from the source data via penalized objectives [see, e.g., 1, 3, 2, 13]. Recent works of [4, 5] consider constrained objectives for STL, mostly in classification settings. These various works are rather statistical in nature as they focus on understanding generalization properties of the solutions rather than their efficient estimation.

## 2 Setup and Preliminaries

**Data Distributions.**  $P$  and  $Q$  denote *source* and *target* distributions over  $\mathcal{X} \times \mathcal{Y}$ ,  $\mathcal{X} \subseteq \mathbb{R}^d$ ,  $\mathcal{Y} \subseteq \mathbb{R}$ .

**General Setting and Risks.** We consider a class of functions  $f_\theta : \mathcal{X} \mapsto \mathcal{Y}$ , parametrized by  $\theta \in \Theta \subset \mathbb{R}^D$ . For any distribution  $\mu$ , e.g.,  $P$  or  $Q$ , we let  $R_\mu(\theta) \doteq \mathbb{E}_\mu \ell(f_\theta(X), Y)$ , for a loss function  $\ell$ , and we let  $\theta_\mu^*$  denote a risk minimizer. The *excess risk* is then defined as  $\mathcal{E}_\mu(\theta) \doteq R_\mu(\theta) - R_\mu(\theta_\mu^*)$ . The target excess risk  $\mathcal{E}_Q(\cdot)$  is of main interest in STL.

### 2.1 Instantiation for Linear Settings.

As explained in the introduction, we focus on the case of linear regression with square loss in the main text. In this case we assume  $\mathbb{E}_\mu[Y|X] = \theta_\mu^{*\top} X$  for  $\theta_\mu^*$  in  $\mathbb{R}^d$ .

**Assumption 1.** For both distributions, we also assume that  $Y - \mathbb{E}[Y|X]$  is  $\sigma_y$ -sub-gaussian and has zero mean, while  $X$  is bounded, i.e.,  $\sup_{x \in \mathcal{X}} \|x\| < \infty$ .

**Relating  $P$  to  $Q$ .** We use the notation  $\Sigma_\mu \doteq \mathbb{E}_\mu XX^\top$  and  $\|v\|_\Sigma \doteq v^\top \Sigma v$  for  $v \in \mathbb{R}^d$ ,  $\Sigma \in \mathbb{R}^{d \times d}$ .

Recent results [14, 15, 16, 17, 18] have highlighted two essential quantities: (i)  $\lambda_{\max}(\Sigma_P^{-1} \Sigma_Q)$ , which characterizes the change in marginals  $P_X \rightarrow Q_X$ , and (ii)  $\mathcal{E}_Q(\theta_P^*) \doteq \|\theta_P^* - \theta_Q^*\|_{\Sigma_Q}^2$ , the change in optimal predictors. The first quantity remains relevant even when  $\theta_P^* = \theta_Q^*$  and upper bounds error ratios  $\|\theta - \theta_P^*\|_{\Sigma_Q}^2 / \|\theta - \theta_P^*\|_{\Sigma_P}^2$ .

**Assumption 2.**  $\Sigma_P$  is full rank, while  $\Sigma_Q$  may not be.

The above assumption on  $\Sigma_P$  may be somewhat relaxed, but is relevant in the transfer setting since otherwise  $P$  may yield no information on  $Q$  (in particular,  $\lambda_{\max}(\Sigma_P^{-1} \Sigma_Q)$  is ill-defined).

**Empirical Quantities.** Throughout we assume that the learner has access to  $n_P$  labeled samples  $S_P \sim P^{n_P}$ , and  $n_Q$  labeled samples  $S_Q \sim Q^{n_Q}$ . We use  $X_P$  and  $X_Q$  to denote the set of feature vectors from  $S_P$  and  $S_Q$  respectively. We will also let  $\mathbf{X}_P \in \mathbb{R}^{n_P \times d}$  and  $\mathbf{X}_Q \in \mathbb{R}^{n_Q \times d}$  denote the corresponding data matrices, and  $\mathbf{y}_P \in \mathbb{R}^{n_P}$  and  $\mathbf{y}_Q \in \mathbb{R}^{n_Q}$  denote the corresponding vectors of labels. We use  $S_{PQ}$  to denote the union of  $S_P$  and  $S_Q$ .

Next, for any measure  $\mu$ , we let  $\hat{\Sigma}_\mu$  denote the empirical counterpart of  $\Sigma_\mu$  defined over  $X_\mu$ . Similarly, we let  $\hat{R}_\mu(\theta) \doteq \frac{1}{n_\mu} \sum_{(x_i, y_i) \in S_\mu} (\theta^\top x_i - y_i)^2$ . The following empirical risk minimizers (ERM's) are important to the analysis even though they are never directly computed:

**Definition 1.** We let  $\hat{\theta}_\mu \in \arg \min_{\theta \in \mathbb{R}^d} \hat{R}_\mu(\theta)$  denote the minimum norm ERM.

In particular,  $\hat{\theta}_P$  and  $\hat{\theta}_Q$  will serve as baselines, i.e., we aim to outperform their risks under  $Q$ .

**Additional Notation.** Given a symmetric matrix  $\Sigma$ , we use  $\lambda_{\min}^+(\Sigma)$  to denote its smallest non-zero eigenvalue. We write  $a \lesssim b$  to indicate that  $a \leq C \cdot b$  for some universal constant  $C$ .

### 3 Procedure

**Key Convex Programs.** As explained in the introduction, we aim to derive an efficient procedure to approximately track the following CP's, which, as we will later show, achieves rates of transfer automatically adaptive to whether the source or target data is most beneficial.

$$\min_{\theta \in \mathbb{R}^d} \hat{R}_P(\theta) \quad \text{subject to :} \quad \hat{R}_Q(\theta) \leq \hat{R}_Q(\theta_{Q,t}) + 6\epsilon_Q, \quad (2)$$

for  $\theta_{Q,t} \xrightarrow{t \rightarrow \infty} \hat{\theta}_Q$ . Intuitively, the above CP's aim for an interpolator between  $\hat{\theta}_P$  and  $\hat{\theta}_Q$  that constrains  $Q$ -excess risk to be of order no more than  $\epsilon_Q = O(d/n_Q)$ . The solution of the limiting CP will therefore be important to our analysis, and is highlighted in the following definition.

Consider the Lagrangian problem

$$\max_{\lambda \geq 0} \min_{\theta \in \mathbb{R}^d} \hat{R}_P(\theta) + \lambda(\hat{R}_Q(\theta) - \hat{R}_Q(\hat{\theta}_Q) - 6\epsilon_Q). \quad (3)$$

The saddle-point of the Lagrangian will be of importance in our analysis.

**Definition 2.** We let  $(\lambda^*, \tilde{\theta}_{PQ})$  denote the solution of (3) above, whereby, by strong duality,  $\tilde{\theta}_{PQ}$  is the solution of the limiting CP in (2).

**Mixed-Samples SGD.** Algorithm 1 aims to approximate  $(\lambda^*, \tilde{\theta}_{PQ})$  iteratively. However, since  $\hat{\theta}_Q$  is unknown at the start of the procedure, the exact Lagrangian in (3) is undefined. Instead, the procedure maintains estimates of  $\theta_{Q,t}$  of  $\hat{\theta}_Q$  in parallel, and optimizes a time-varying Lagrangian  $\mathcal{L}_t(\lambda, \theta) = \hat{R}_P(\theta) + \lambda(\hat{R}_Q(\theta) - \hat{R}_Q(\theta_{Q,t}) - 6\epsilon_Q)$ . Notice that the iterative updates of  $\lambda_t$  are in terms of stochastic estimates of the constraint violations, and therefore tracks the  $Q$ -risk of iterates  $\theta_t$ . Iterates  $\lambda_t$  can thus be used in turn to adjust the sampling rates (see setting of  $\xi_t$ ), i.e., to bias towards sampling from  $S_P$  or  $S_Q$ .

### 4 Main Results: Instantiation for Linear Regression

We use the notation  $M_x = \sup_{x \in \mathcal{X}} \|x\|$ ,  $\hat{M}_y = \max_{(x,y) \in S_{PQ}} |y|$  and  $\kappa_Q \doteq \frac{\lambda_{\max}^+(\hat{\Sigma}_Q)}{\lambda_{\min}^+(\hat{\Sigma}_Q)}$  throughout this section and subsequent sections. We start with the following definitions.

**Definition 3** (Key Lipschitz Parameters). Let  $\rho \doteq \|\theta_0 - \tilde{\theta}_{PQ}\|$ . We then define

$$\hat{G}_\theta = \sup \left\{ \|\nabla \ell(\theta; x, y)\| : \|\theta - \tilde{\theta}_{PQ}\|^2 \leq 2\rho^2, (x, y) \in S_{PQ} \right\},$$

$$\hat{G}_\lambda = \sup \left\{ |\ell(\theta; x, y) - \ell(\theta'; x, y) - 6\epsilon_Q| : \|\theta - \tilde{\theta}_{PQ}\|^2 \leq 2\rho^2, (x, y) \in S_{PQ}, \|\theta'\|^2 \leq \left( \frac{1 + \log(T + 2\kappa_Q)}{\lambda_{\min}^+(\hat{\Sigma}_Q)} M_x \hat{M}_y \right)^2 \right\}.$$

---

**Algorithm 1: Mixed-Sample SGD**


---

**Input:**  $\theta_0 = \theta_{Q,0} = 0$ ,  $\lambda_0 = 0$ , stepsize  $\{\alpha_t\}_{t=0}^{T-1}$  and  $\eta, \gamma, \epsilon_Q$ .

**for**  $t = 0, \dots, T-1$  **do**

    Draw  $\xi_t \sim \text{Bernoulli}(\frac{1}{1+\lambda_t})$

**if**  $\xi_t = 1$  **then**

        Sample  $(x_t, y_t)$  uniformly from  $S_P$

$\theta_{t+1} = \theta_t - \eta(1 + \lambda_t)\nabla\ell(\theta_t; x_t, y_t)$

**end**

**else**

        Sample  $(x_t, y_t)$  uniformly from  $S_Q$

$\theta_{t+1} = \theta_t - \eta(1 + \lambda_t)\nabla\ell(\theta_t; x_t, y_t)$

**end**

    Sample  $(x_t, y_t)$  uniformly from  $S_Q$

$\lambda_{t+1} = [(1 - \gamma\eta)\lambda_t + \eta(\ell(\theta_t; x_t, y_t) - \ell(\theta_{Q,t}; x_t, y_t) - 6\epsilon_Q)]_+$

$\theta_{Q,t+1} = \theta_{Q,t} - \alpha_t \nabla\ell(\theta_{Q,t}; x_t, y_t)$

**end**

$\hat{\theta}_{PQ} = \ell_2$  projection of  $\frac{1}{T} \sum_{t=0}^{T-1} \theta_t$  onto the constraint set  $\{\theta : \hat{R}_Q(\theta) - \hat{R}_Q(\theta_{Q,T}) \leq 3\epsilon_Q\}$ .

**Output:**  $\hat{\theta}_{PQ}$

---

Our main results for Algorithm 1 are provided below.

**Theorem 1.** Suppose parameters in Algorithm 1 are set as  $\eta = \frac{c_\eta}{\sqrt{T}}$ ,  $\gamma = c_\gamma \cdot \eta$ , and  $\alpha_t = \frac{1}{\lambda_{\min}^+(\hat{\Sigma}_Q)} \cdot \frac{1}{t+2\kappa_Q}$  for some  $c_\eta$  and  $c_\gamma$ . Then, with probability  $1 - 5\tau$  over  $S_P, S_Q$  and the randomness in the procedure, the following holds for  $c_\eta$  sufficiently small as a function of  $(\hat{G}_\theta, \hat{G}_\lambda, \lambda^*, \rho)$ , and  $c_\gamma \geq \hat{G}_\theta^2$ . The returned solution satisfies

$$\mathcal{E}_Q(\hat{\theta}_{PQ}) \lesssim \min \{ \epsilon_Q, \lambda_{\max}(\Sigma_P^{-1}\Sigma_Q) \cdot \epsilon_P + \mathcal{E}_Q(\theta_P^*) \},$$

for  $\epsilon_P = c_0 \frac{\sigma_y^2(d+\log(1/\tau))}{n_P}$ ,  $\epsilon_Q = c_0 \frac{\sigma_y^2(d+\log(1/\tau))}{n_Q}$  for some universal constant  $c_0 > 0$ , provided a number of iterations

$$T \gtrsim \left( \hat{G}_\theta + \hat{G}_\lambda \sqrt{\log \frac{1}{\tau}} \right)^2 \cdot \left( \frac{\frac{\hat{G}_\theta^2}{c_\eta} + \hat{G}_\theta \hat{G}_\lambda \sqrt{\log \frac{1}{\tau}}}{\lambda_{\min}^+(\hat{\Sigma}_Q) \epsilon_Q \epsilon_P} + \frac{\lambda^* \hat{G}_\lambda \sqrt{\log \frac{1}{\tau} + \frac{\rho^2}{c_\eta}}}{\epsilon_P} \right)^2.$$

The theorem is derived from both Theorem 2 of Section 5.1 (on optimization rates) and Theorem 3 of Section 5.2 on statistical rates. The exact requirements on  $c_\eta$  are given in Theorem 2.

For completeness, in Section 4.1 we provide sample-dependent upper-bounds on intervening quantities, namely  $\rho, \lambda^*, \hat{G}_\theta, \hat{G}_\lambda$ , in terms of less opaque quantities.

**Adaptivity.** As so far discussed, the bounds of Theorem 1 guarantee that the procedure achieves a target risk always adaptive to whether the source or target is most beneficial: notice that if we were to use either the target sample alone or the source sample alone, we would be respectively achieving rates of the form  $\mathcal{E}(\hat{\theta}_Q) \lesssim \epsilon_Q$ , and  $\mathcal{E}(\hat{\theta}_P) \lesssim \lambda_{\max}(\Sigma_P^{-1}\Sigma_Q) \cdot \epsilon_P + \mathcal{E}_Q(\theta_P^*)$ . In other words, the returned solution  $\hat{\theta}_{PQ}$  achieves a rate that interpolates between the two. This is illustrated by the simulations results of Figure 1 (the exact setting is described in detail in Section 6.1).

#### 4.1 Sample-dependent Choices of Parameters $\eta$ and $\gamma$ .

In this section we provide sample-dependent upper-bounds on  $\rho, \hat{G}_\theta, \hat{G}_\lambda$  and  $\lambda^*$  which drive the choice of  $\eta$  and  $\gamma$  in Theorem 1.

**Lemma 1** ( $\rho$ ). Assume  $\hat{\Sigma}_P$  is invertible. The following upper bound holds:

$$\rho^2 = \|\theta_0 - \tilde{\theta}_{PQ}\|^2 \leq \left( \frac{\hat{\mathcal{E}}_P(\hat{\theta}_Q)}{\lambda_{\min}(\hat{\Sigma}_P)} + \frac{M_x \hat{M}_y}{\lambda_{\min}(\hat{\Sigma}_P)} \right)^2 \quad (4)$$

---

**Algorithm 2: Warm-up**


---

**Input:**  $\theta_{Q,0} = 0$ , stepsize  $\{\alpha_t\}_{t=0}^{N-1}$   
**for**  $t = 0, \dots, N-1$  **do**  
    Sample  $(x_t, y_t)$  uniformly from  $S_Q$   
     $\theta_{Q,t+1} = \theta_{Q,t} - \alpha_t \nabla \ell(\theta_{Q,t}; x_t, y_t)$   
**end**  
**Output:**  $\theta_{Q,N}$

---

164 Furthermore, let  $\theta_{Q,N}$  denote the output of the warmup procedure Algorithm 2 with stepsize  $\alpha_t =$   
165  $\frac{1}{\lambda_{\min}^+(\hat{\Sigma}_Q)} \cdot \frac{1}{t+2\kappa_Q}$ . Then we can further bound (4) by the following quantity

$$\frac{1}{2} \left( \frac{\|\nabla \hat{R}_P(\theta_{Q,N})\|^2 + \left( \frac{\lambda_{\max}(\hat{\Sigma}_P)}{\lambda_{\min}^+(\hat{\Sigma}_Q)} \right)^2 \|\nabla \hat{R}_Q(\theta_{Q,N})\|^2}{\lambda_{\min}^2(\hat{\Sigma}_P)} \right)^2 + 2 \frac{M_x^2 \hat{M}_y^2}{\lambda_{\min}^2(\hat{\Sigma}_P)}. \quad (5)$$

166 **Remark 1.** Lemma 1 provides a computable upper bound of  $\rho$ , which requires a few steps of SGD to  
167 estimate  $\hat{\theta}_Q$ . As the number of steps  $N$  increases, the  $\|\nabla \hat{R}_Q(\theta_{Q,N})\|^2$  term in (5) tends to 0, and the  
168 whole bound becomes a tighter approximation of (4).

169 **Lemma 2** ( $\hat{G}_\theta$ ). The following statement holds for  $\hat{G}_\theta$ :  $\hat{G}_\theta \leq 3M_x^2\rho + M_x\hat{M}_y$ .

170 **Lemma 3** ( $\hat{G}_\lambda$ ). The following statement holds for  $\hat{G}_\lambda$ :

$$\hat{G}_\lambda \leq 18 \left( M_x^2\rho^2 + \hat{M}_y + \frac{M_x^4\hat{M}_y^2(1 + \log(T + 2\kappa_Q))^2}{(\lambda_{\min}^+(\hat{\Sigma}_Q))^2} \right) + 6\epsilon_Q. \quad (6)$$

171 **Lemma 4** ( $\lambda^*$ ). Let  $\lambda^*$  be defined in Definition 2. The following statement holds for  $\lambda^*$ :

$$\lambda^* \leq \frac{\lambda_{\max}(\hat{\Sigma}_P)}{\lambda_{\min}^+(\hat{\Sigma}_Q)} + \frac{\|\nabla \hat{R}_P(\hat{\theta}_Q)\|}{2\sqrt{\lambda_{\min}^+(\hat{\Sigma}_Q)}\epsilon_Q}.$$

172 **Remark 2.** In Lemma 4, the second term depends on the norm of  $\nabla \hat{R}_P(\hat{\theta}_Q)$  divided by  $\sqrt{\epsilon_Q}$ . If  $\hat{\theta}_P$   
173 is close to  $\hat{\theta}_Q$ , then the second term becomes small. As in Lemma 1, one can also use Algorithm 2 to  
174 find an approximation of  $\hat{\theta}_Q$ , which yields a computable upper bound of  $\lambda^*$

## 175 5 Analysis Overview

176 In this section, we will provide more detailed convergence bound and generalization bound, as  
177 well as an overview of the analysis of our algorithm. Theorem 2 provides the convergence result  
178 of Algorithm 1, with more detailed parameter setup than Theorem 1. Theorem 3 provides the  
179 generalization guarantee of our algorithm.

### 180 5.1 Convergence Analysis

181 The following Theorem provides the convergence rate of Algorithm 1.

182 **Theorem 2.** Let  $\rho = \|\theta_0 - \tilde{\theta}_{PQ}\|$ ,  $\tau \leq 0.1$ , and  $\sigma_{PQ}, c_\eta$  be some positive real numbers such that

$$\sigma_{PQ}^2 \leq 256 (1 + (\lambda^*)^2 + \rho^2) \hat{G}_\theta^2, \quad c_\eta \leq \min \left\{ \frac{\rho}{2\sqrt{2}\hat{G}_\lambda}, \frac{\rho}{16\sqrt{6}\sigma_{PQ}\sqrt{\log 2/\tau}}, \frac{\rho}{C_{PQ}} \right\},$$

183 where  $C_{PQ} = (1 + 2\kappa_Q)M_x^2\hat{M}_y^2 + \frac{6\sigma_Q^2 \log(2/\tau)}{\lambda_{\min}^+(\hat{\Sigma}_Q)}$ , and  $\sigma_Q^2 = \left( \frac{\log(T+2\kappa_Q)}{\lambda_{\min}^+(\hat{\Sigma}_Q)} M_x\hat{M}_y \right)^2$ . Suppose  
184 the parameters in Algorithm 1 are set as  $\eta = \frac{c_\eta}{\sqrt{T}}$ ,  $\gamma = \frac{\hat{G}_\theta^2 c_\eta}{\sqrt{T}}$ ,  $\alpha_t = \frac{1}{\lambda_{\min}^+(\hat{\Sigma}_Q)} \cdot \frac{1}{t+2\kappa_Q}$ . Assume

185  $T \geq \max\{\frac{C_{PQ} \log T}{\epsilon_Q}, (\frac{C_{PQ}(\log(T+2\kappa_Q))^2}{\hat{G}_\lambda \sqrt{\log 1/\tau}})^2\}$ ,  $\epsilon_Q \cdot \lambda_{\min}^+(\hat{\Sigma}_Q) \leq 1$  and  $M_x \geq 1$ . With probability at  
 186 least  $1 - \tau$  over the randomness of Algorithm 1, the empirical risk of the returned solution satisfies:

$$\hat{R}_P(\hat{\theta}_{PQ}) - \hat{R}_P(\tilde{\theta}_{PQ}) \lesssim \left( \hat{G}_\theta + \hat{G}_\lambda \sqrt{\log \frac{1}{\tau}} \right) \cdot \left( \frac{\frac{\hat{G}_\theta^2}{c_n} + \hat{G}_\theta \hat{G}_\lambda \sqrt{\log \frac{1}{\tau}}}{\lambda_{\min}^+(\hat{\Sigma}_Q) \epsilon_Q \sqrt{T}} + \frac{\lambda^* \hat{G}_\lambda \sqrt{\log \frac{1}{\tau}} + \frac{\rho^2}{c_n}}{\sqrt{T}} \right).$$

187 Moreover, the total computational complexity of the algorithm is  $O(dT) + \text{time for projection}$ .

188 **Proof Sketch:** We define  $\bar{\theta}_T \doteq \frac{1}{T} \sum_{t=0}^{T-1} \theta_t$  and  $g(\theta) \doteq \hat{R}_Q(\theta) - \hat{R}_Q(\hat{\theta}_Q) - 6\epsilon_Q$ . First, we  
 189 inductively show that, if choose a properly small  $\eta$ , we can control all the iterates  $(\theta_t, \lambda_t)$  as well as the  
 190 final solution  $\hat{\theta}_{PQ}$  to be stay around  $\tilde{\theta}_{PQ}$  and  $\lambda^*$ . Hence, we can apply the  $\hat{G}_\theta$  Lipschitzness on those  
 191 iterates and decompose the risk as:  $\hat{R}_P(\hat{\theta}_{PQ}) - \hat{R}_P(\tilde{\theta}_{PQ}) \leq \hat{G}_\theta \|\bar{\theta}_T - \hat{\theta}_{PQ}\| + \hat{R}_P(\bar{\theta}_T) - \hat{R}_P(\tilde{\theta}_{PQ})$ .  
 192 To further bound  $\|\bar{\theta}_T - \hat{\theta}_{PQ}\|$  and  $\hat{R}_P(\bar{\theta}_T) - \hat{R}_P(\tilde{\theta}_{PQ})$ , we analyze the convergence of the Lagrangian  
 193 function and obtain that

$$\hat{R}_P(\bar{\theta}_T) - \hat{R}_P(\tilde{\theta}_{PQ}) + \frac{(g(\bar{\theta}_T))^2}{2(\gamma + \frac{1}{\eta T})} \leq \frac{c_1}{\sqrt{T}} + \frac{c_2 \log T}{T} + c_3 \cdot |g(\bar{\theta}_T)| \quad (7)$$

194 for some real numbers  $c_1, c_2, c_3$  depending on  $T, c_\eta, \hat{G}_\theta, \hat{G}_\lambda, \rho, \lambda^*, \epsilon_Q$  and  $\lambda_{\min}^+(\hat{\Sigma}_Q)$ . Next, we will  
 195 derive the lower and upper bound of  $g(\bar{\theta}_T)$  in terms of  $\|\bar{\theta}_T - \hat{\theta}_{PQ}\|$ :

$$(g(\bar{\theta}_T))^2 \geq \frac{3}{2} \lambda_{\min}^+(\hat{\Sigma}_Q) \epsilon_Q \|\bar{\theta}_T - \hat{\theta}_{PQ}\|^2 - \Delta^2, g(\bar{\theta}_T) \leq \hat{G}_\theta \|\bar{\theta}_T - \hat{\theta}_{PQ}\|,$$

196 for  $\Delta \doteq 3\epsilon_Q - (\hat{R}_Q(\theta_{Q,T}) - \hat{R}_Q(\hat{\theta}_Q))$  which captures the error from projecting  $\bar{\theta}_T$  onto the  
 197 inexact constraint set  $\hat{R}_Q(\theta) - \hat{R}_Q(\theta_{Q,T}) - 3\epsilon_Q \leq 0$ . Plugging the above bounds together with  
 198  $\hat{R}_P(\bar{\theta}_T) - \hat{R}_P(\tilde{\theta}_{PQ}) \geq -\hat{G}_\theta \|\bar{\theta}_T - \hat{\theta}_{PQ}\|$  back to ((7)) one can solve an upper bound of  $\|\bar{\theta}_T - \hat{\theta}_{PQ}\|$ .  
 199 Notice that (7) immediately gives an upper bound of  $\hat{R}_P(\bar{\theta}_T) - \hat{R}_P(\tilde{\theta}_{PQ})$  which concludes the proof.

## 200 5.2 Generalization Analysis

201 The following result establishes the generalization guarantee of our algorithm.

202 **Theorem 3.** Suppose  $\hat{\theta}_{PQ}$  satisfies  $\hat{R}_P(\hat{\theta}_{PQ}) - \hat{R}_P(\tilde{\theta}_{PQ}) \leq \epsilon_P$ . Then with probability at least  
 203  $1 - 4\tau$  over  $S_P$  and  $S_Q$ , the excess risk of  $\hat{\theta}_{PQ}$  on  $Q$  satisfies:

$$\mathcal{E}_Q(\hat{\theta}_{PQ}) \leq 26 \min \{ \epsilon_Q, \lambda_{\max}(\Sigma_P^{-1} \Sigma_Q) \epsilon_P + \mathcal{E}_Q(\theta_P^*) \}.$$

204 To prove Theorem 3, we first introduce some technical lemmas. The following lemma gives two  
 205 information: (i) any  $\theta$  in the constraint set of (2) will have a small  $Q$  risk, and (ii) any  $\theta$  that has a  
 206 small  $Q$  risk is covered by our constraint set with high probability.

207 **Lemma 5.** With probability at least  $1 - 2\tau$ , the following holds: for any  $\theta \in \{\theta : \|\theta - \hat{\theta}_Q\|_{\hat{\Sigma}_Q}^2 \leq 6\epsilon_Q\}$ ,  
 208 we have  $\mathcal{E}_Q(\theta) \leq 26\epsilon_Q$ . For any  $\theta$  such that  $\mathcal{E}_Q(\theta) \leq \epsilon_Q$ , it is in  $\{\theta : \|\theta - \hat{\theta}_Q\|_{\hat{\Sigma}_Q}^2 \leq 6\epsilon_Q\}$ .

209 The next lemma shows that, if  $\theta_P^*$  is in the constraint set of (2), any  $\theta$  in the constraint set with a  
 210 small empirical risk on  $P$ , then it should also have a small population risk on  $P$ .

211 **Lemma 6.** If  $\theta_P^* \in \{\theta : \|\theta - \hat{\theta}_Q\|_{\hat{\Sigma}_Q}^2 \leq 6\epsilon_Q\}$ , then for any  $\theta \in \{\theta : \|\theta - \hat{\theta}_Q\|_{\hat{\Sigma}_Q}^2 \leq 6\epsilon_Q\}$ , with  
 212 probability at least  $1 - 2\tau$  we have  $\mathcal{E}_P(\theta) \leq 4(\hat{R}_P(\theta) - \hat{R}_P(\tilde{\theta}_{PQ})) + 16\epsilon_P$ .

213 The next Lemma considers the situation where  $\theta_P^*$  is not in the constraint set of (2). Due to the  
 214 inclusive property of our constraint set (Lemma 5), we can claim that any  $\theta$  in the constraint set has a  
 215 smaller  $Q$  excess risk than  $\theta_P^*$  up to some multiplicative universal constant.

216 **Lemma 7.** If  $\theta_P^* \notin \{\theta : \|\theta - \hat{\theta}_Q\|_{\hat{\Sigma}_Q}^2 \leq 6\epsilon_Q\}$ , then for any  $\theta \in \{\theta : \|\theta - \hat{\theta}_Q\|_{\hat{\Sigma}_Q}^2 \leq 6\epsilon_Q\}$ , with  
 217 probability at least  $1 - 2\tau$  we have  $\mathcal{E}_Q(\theta) \leq 26\mathcal{E}_Q(\theta_P^*)$ .

218 **Proof of Theorem 3.** First, if  $\theta_P^* \in \{\theta : \|\theta - \hat{\theta}_Q\|_{\Sigma_Q}^2 \leq 6\epsilon_Q\}$ , then since  $\hat{R}_P(\hat{\theta}_{PQ}) - \hat{R}_P(\tilde{\theta}_{PQ}) \leq$   
 219  $\epsilon_P$ , from Lemma 6 we know with probability at least  $1 - 2\tau$ ,  $\mathcal{E}_P(\hat{\theta}_{PQ}) \leq 4\epsilon_P + 16\epsilon_P = 20\epsilon_P$ . Hence  
 220  $\mathcal{E}_Q(\hat{\theta}_{PQ}) = \|\hat{\theta}_{PQ} - \theta_Q^*\|_{\Sigma_Q}^2 \leq \lambda_{\max}(\Sigma_P^{-1}\Sigma_Q) \cdot 20\epsilon_P + \mathcal{E}_Q(\theta_P^*)$ . If  $\theta_P^* \notin \{\theta : \|\theta - \hat{\theta}_Q\|_{\Sigma_Q}^2 \leq 6\epsilon_Q\}$ ,  
 221 from Lemma 7 we know  $\mathcal{E}_Q(\hat{\theta}_{PQ}) \leq 26\mathcal{E}_Q(\theta_P^*)$ . Hence we know with probability at least  $1 - 2\tau$ ,

$$\mathcal{E}_Q(\hat{\theta}_{PQ}) \leq 26 (\lambda_{\max}(\Sigma_P^{-1}\Sigma_Q) \cdot \epsilon_P + \mathcal{E}_Q(\theta_P^*)).$$

222 On the other hand, since  $\hat{\theta}_{PQ} \in \{\theta : \|\theta - \hat{\theta}_Q\|_{\Sigma_Q}^2 \leq 6\epsilon_Q\}$ , from Lemma 5 we know  $\mathcal{E}_Q(\hat{\theta}_{PQ}) \leq$   
 223  $26\epsilon_Q$ . Putting piece together we have with probability at least  $1 - 4\tau$ , it holds that

$$\mathcal{E}_Q(\hat{\theta}_{PQ}) \leq 26 \min \{\epsilon_Q, \lambda_{\max}(\Sigma_P^{-1}\Sigma_Q) \cdot \epsilon_P + \mathcal{E}_Q(\theta_P^*)\}.$$

224 □  
 225 **Proof of Theorem 1.** In Theorem 2, choosing  $T$  such that  $\hat{R}_P(\hat{\theta}_{PQ}) - \hat{R}_P(\tilde{\theta}_{PQ}) \leq \epsilon_P$ , together  
 226 with Theorem 3 will conclude the proof. □

## 227 6 Experiments

228 In this section, we present the experimental results of our algorithm and the baseline algorithms  
 229 on both synthetic and real-world datasets. We implement our algorithm using Python on an Intel  
 230 i7-8700 CPU. We use the CVXPY [19] package to implement the projection step in Algorithm 1.  
 231 The baseline algorithms we consider are source ERM, target ERM, projected SGD (PSGD) (widely  
 232 used for solving constrained problems) and Hypothesis Transfer Learning (HTL). For HTL, we use  
 233 5-fold cross-validation on the target training data to select the best bias parameter. For PSGD, we  
 234 also employ CVXPY to implement the projection steps. Throughout the figures in this section, we  
 235 use  $\hat{\theta}_{PSGD}$  and  $\hat{\theta}_{HTL}$  to denote the model obtained by PSGD and HTL respectively. Due to page  
 236 limit, we only present part of the results and defer additional ones to the appendix.

### 237 6.1 Regression Task on the Synthetic Dataset.

238 We start with the results on the synthetic dataset.  
 239 Throughout this subsection, we set the model  
 240 dimension  $d$  to be 50. The distribution  $P$  and  $Q$   
 241 are set to be  $d$ -dimensional multivariate Gaus-  
 242 sian with certain mean and covariance. The label  
 243 is generated as  $y = \theta_\mu^* x + \varepsilon$  for  $\mu \in \{P, Q\}$ ,  
 244 where  $\varepsilon \sim \mathcal{N}(0, 1)$ . The results are demon-  
 245 strated in Figure 1 and 2. In Figure 1 (Left),  
 246 we fix  $n_Q = 100$  and vary  $n_P$  from 100 to  
 247 1500. When  $n_P$  is small, target ERM learning  
 248 can work better, while as we increase  $n_P$ , the  
 249 source data becomes more useful. Our method  
 250 can adapt to these two regimes automatically. It can also be seen that the ERM procedure has large  
 251 uncertainty (variance) when the training data is insufficient, while our method is significantly more  
 252 stable. In Figure 1 (Middle) and (Right), we fix  $n_Q = 100$ ,  $n_P = 500$ , and gradually increase  
 253  $\lambda_{\max}(\Sigma_P^{-1}\Sigma_Q)$  and  $\mathcal{E}_Q(\theta_P^*)$ , which measures the hardness of transfer. As the hardness increases,  
 254 source ERM model performs poorly, while our method can always yield a model that is comparable  
 255 to the better one between  $\hat{\theta}_P$  and  $\hat{\theta}_Q$ . In Figure 2, we set  $\Sigma_Q$  to be low rank and the target sample  
 256 size to be extremely small ( $n_Q = 50$ ). In this case, the constraint set is unbounded but our method  
 257 still works well. The rate of our method is still adaptive, while due to the limited target data, HTL  
 258 struggles to find a suitable regularization parameter through cross-validation, and hence loses the  
 259 adaptivity.

### 260 6.2 Regression Task on the School Dataset.

261 To demonstrate the performance of our method on real-world data, we conduct the experiments on  
 262 the School Dataset [20]. The dataset contains student information from 139 schools. The input  $x$  is

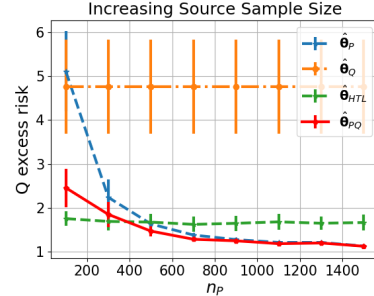

Figure 2: Linear regression results on the synthetic dataset with low-rank  $\Sigma_Q$ . The constraint set is then unbounded but our method still works well.



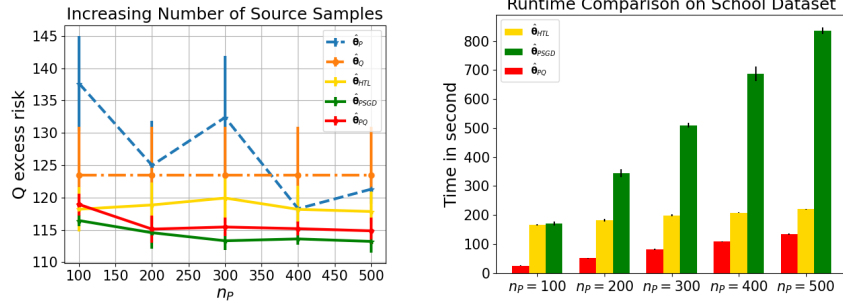

Figure 3: Linear regression results on the School dataset. (Left) Excess risk on  $Q$ . (Right) Runtime comparison. Mixed-Samples SGD  $\hat{\theta}_{PQ}$  achieves  $Q$ -risk nearly the same of that of the ideal projection method  $\hat{\theta}_{PSGD}$ , while achieving significantly faster runtime.

a 27-dimensional vector containing student information and the label  $y$  is the student’s exam score. Following [21], we use the data points from the first 100 schools as the source domain and the rest as the target. We fix  $n_Q = 100$  and vary  $n_P$  from 100 to 500. Figure 3 shows the MSE and runtime comparison with source ERM, target ERM, PSGD and HTL. We can see from Figure 3 (Left) that our method consistently outperforms source ERM, target ERM, and HTL, and *automatically adapts* to the better rate between source and target ERM learning. Only PSGD yields performance comparable to ours since it solves the same objective we proposed in (2), but it requires significantly longer time than our method, as shown in Figure 3 (Right).

### 6.3 Binary Classification Task on the CIFAR-10 Dog vs Cat Dataset.

At last, to demonstrate that our algorithm can work for general convex losses, we conduct the binary classification experiment on the CIFAR-10 Dog vs Cat dataset [22], using linear classifier and logistic loss. We construct source and target tasks by varying the proportion of dog and cat images. In the source dataset, the ratio is 50% dog and 50% cat. For the target training and testing dataset, the ratio is adjusted to 80% dog and 20% cat. We fix  $n_Q = 50$  and vary  $n_P$  from 50 to 300. The results are reported in Figure 4. Even when the target sample size is small, our method can still enjoy an adaptive rate, while HTL fails because there is not enough validation data to find a good bias parameter.

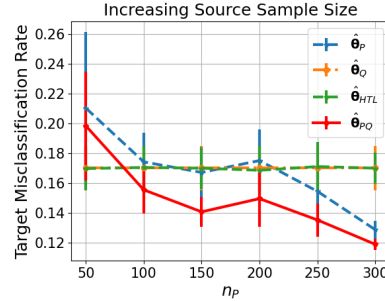

Figure 4: Binary classification results on the CIFAR Dog vs Cat dataset. We use linear classifier with logistic loss. Input features of dimension 512 are extracted by ResNet18. It verifies that our algorithm can work on the general loss.

## 7 Conclusion

In this paper, we propose a concrete optimization algorithm with provable convergence and generalization guarantee in supervised transfer learning. The analyzed procedure is a mixed-samples SGD approach that alternates between sampling from source or target data at an adaptive sampling rate. Both theoretical and experimental results show that our method is adaptive to whether the source or target data are most beneficial. This work aims to initiate the theoretical study of computationally efficient methods for transfer learning.

## References

- [1] Ilja Kuzborskij and Francesco Orabona. Stability and hypothesis transfer learning. In *International Conference on Machine Learning*, pages 942–950. PMLR, 2013.
- [2] Ilja Kuzborskij and Francesco Orabona. Fast rates by transferring from auxiliary hypotheses. *Machine Learning*, 106:171–195, 2017.

- [3] Shai Ben-David and Ruth Uner. On the hardness of domain adaptation and the utility of unlabeled target samples. In *Algorithmic Learning Theory: 23rd International Conference, ALT 2012, Lyon, France, October 29-31, 2012. Proceedings 23*, pages 139–153. Springer, 2012.
- [4] Steve Hanneke and Samory Kpotufe. On the value of target data in transfer learning. *Advances in Neural Information Processing Systems*, 32, 2019.
- [5] Steve Hanneke and Samory Kpotufe. A more unified theory of transfer learning. *arXiv preprint arXiv:2408.16189*, 2024.
- [6] Mehrdad Mahdavi, Tianbao Yang, Rong Jin, Shenghuo Zhu, and Jinfeng Yi. Stochastic gradient descent with only one projection. In F. Pereira, C.J. Burges, L. Bottou, and K.Q. Weinberger, editors, *Advances in Neural Information Processing Systems*, volume 25. Curran Associates, Inc., 2012.
- [7] John Blitzer, Koby Crammer, Alex Kulesza, Fernando Pereira, and Jennifer Wortman. Learning bounds for domain adaptation. *Advances in neural information processing systems*, 20, 2007.
- [8] Yishay Mansour, Mehryar Mohri, and Afshin Rostamizadeh. Domain adaptation: Learning bounds and algorithms. *arXiv preprint arXiv:0902.3430*, 2009.
- [9] Shai Ben-David, John Blitzer, Koby Crammer, Alex Kulesza, Fernando Pereira, and Jennifer Wortman Vaughan. A theory of learning from different domains. *Machine learning*, 79:151–175, 2010.
- [10] Mehryar Mohri and Andres Muñoz Medina. New analysis and algorithm for learning with drifting distributions. In *Algorithmic Learning Theory: 23rd International Conference, ALT 2012, Lyon, France, October 29-31, 2012. Proceedings 23*, pages 124–138. Springer, 2012.
- [11] Masashi Sugiyama, Taiji Suzuki, and Takafumi Kanamori. *Density ratio estimation in machine learning*. Cambridge University Press, 2012.
- [12] Masashi Sugiyama, Taiji Suzuki, and Takafumi Kanamori. Density-ratio matching under the bregman divergence: a unified framework of density-ratio estimation. *Annals of the Institute of Statistical Mathematics*, 64:1009–1044, 2012.
- [13] Simon S Du, Jayanth Koushik, Aarti Singh, and Barnabás Póczos. Hypothesis transfer learning via transformation functions. *Advances in neural information processing systems*, 30, 2017.
- [14] Mohammadreza Mousavi Kalan, Zalan Fabian, Salman Avestimehr, and Mahdi Soltanolkotabi. Minimax lower bounds for transfer learning with linear and one-hidden layer neural networks. *Advances in Neural Information Processing Systems*, 33:1959–1969, 2020.
- [15] Xuhui Zhang, Jose Blanchet, Soumyadip Ghosh, and Mark S Squillante. A class of geometric structures in transfer learning: Minimax bounds and optimality. In *International Conference on Artificial Intelligence and Statistics*, pages 3794–3820. PMLR, 2022.
- [16] Jiawei Ge, Shange Tang, Jianqing Fan, Cong Ma, and Chi Jin. Maximum likelihood estimation is all you need for well-specified covariate shift. *arXiv preprint arXiv:2311.15961*, 2023.
- [17] Reese Pathak, Martin J Wainwright, and Lin Xiao. Noisy recovery from random linear observations: Sharp minimax rates under elliptical constraints. *arXiv preprint arXiv:2303.12613*, 2023.
- [18] Yihang Chen, Fanghui Liu, Taiji Suzuki, and Volkan Cevher. High-dimensional kernel methods under covariate shift: Data-dependent implicit regularization. *arXiv preprint arXiv:2406.03171*, 2024.
- [19] Steven Diamond and Stephen Boyd. CVXPY: A Python-embedded modeling language for convex optimization. *Journal of Machine Learning Research*, 17(83):1–5, 2016.
- [20] Arthur Asuncion, David Newman, et al. Uci machine learning repository, 2007.

- 344 [21] Mikhail Konobeev, Ilja Kuzborskij, and Csaba Szepesvári. A distribution-dependent analysis of  
 345 meta learning. In *International Conference on Machine Learning*, pages 5697–5706. PMLR,  
 346 2021.
- 347 [22] Alex Krizhevsky et al. Learning multiple layers of features from tiny images. 2009.
- 348 [23] Shai Shalev-Shwartz and Shai Ben-David. *Understanding machine learning: From theory to*  
 349 *algorithms*. Cambridge university press, 2014.
- 350 [24] Noah Golowich, Alexander Rakhlin, and Ohad Shamir. Size-independent sample complexity of  
 351 neural networks. In *Conference On Learning Theory*, pages 297–299. PMLR, 2018.
- 352 [25] Mehryar Mohri, Afshin Rostamizadeh, and Ameet Talwalkar. Foundations of machine learning.
- 353 [26] Shiry Ginosar, Kate Rakelly, Sarah Sachs, Brian Yin, and Alexei A Efros. A century of portraits:  
 354 A visual historical record of american high school yearbooks. In *Proceedings of the IEEE*  
 355 *International Conference on Computer Vision Workshops*, pages 1–7, 2015.
- 356 [27] Zijian Liu and Zhengyuan Zhou. Revisiting the last-iterate convergence of stochastic gradient  
 357 methods. In *The Twelfth International Conference on Learning Representations*.
- 358 [28] Guanghui Lan. An optimal method for stochastic composite optimization. *Mathematical*  
 359 *Programming*, 133(1):365–397, 2012.

---

**Algorithm 3: Mixed-Sample SGD (Restated for General  $\Theta$ )**


---

**Input:**  $\theta_0 = \theta_{Q,0} = 0$ ,  $\lambda_0 = 0$ , stepsize  $\{\alpha_t\}_{t=0}^{T-1}$  and  $\eta, \gamma, \epsilon_Q$ .

**for**  $t = 0, \dots, T-1$  **do**

    Draw  $\xi_t \sim \text{Bernoulli}(\frac{1}{1+\lambda_t})$

**if**  $\xi_t = 1$  **then**

        Sample  $(x_t, y_t)$  uniformly from  $S_P$

$\theta_{t+1} = \mathcal{P}_\Theta(\theta_t - \eta(1 + \lambda_t)\nabla\ell(\theta_t; x_t, y_t))$

**end**

**else**

        Sample  $(x_t, y_t)$  uniformly from  $S_Q$

$\theta_{t+1} = \mathcal{P}_\Theta(\theta_t - \eta(1 + \lambda_t)\nabla\ell(\theta_t; x_t, y_t))$

**end**

    Sample  $(x_t, y_t)$  uniformly from  $S_Q$

$\lambda_{t+1} = [(1 - \gamma\eta)\lambda_t + \eta(\ell(\theta_t; x_t, y_t) - \ell(\theta_{Q,t}; x_t, y_t) - 3\epsilon_Q)]_+$

$\theta_{Q,t+1} = \mathcal{P}_\Theta(\theta_{Q,t} - \alpha_t\nabla\ell(\theta_{Q,t}; x_t, y_t))$

**end**

$\hat{\theta}_{PQ} = \ell_2$  projection of  $\frac{1}{T} \sum_{t=0}^{T-1} \theta_t$  onto the constraint set  $\{\theta : \hat{R}_Q(\theta) - \hat{R}_Q(\theta_{Q,T}) \leq 2\epsilon_Q\}$ .

**Output:**  $\hat{\theta}_{PQ}$

---

## 360 8 Results for General Losses

361 In this section, we provide the results for general convex losses. We consider a hypothesis class  
362  $\mathcal{H} \doteq \{x \mapsto h_\theta(x) : \theta \in \Theta\}$ . We make the following assumption on the loss function  $\ell$ .

363 **Assumption 3.**  $\ell(\theta; x, y)$  is  $m_1$ -strongly convex and  $m_2$ -smooth in  $\theta$  for any  $(x, y) \in S_{PQ}$ .

364 We define  $\kappa \doteq m_1/m_2$  as the condition number of  $\ell$ .

365 We consider general  $\Theta \subseteq \mathbb{R}^D$ , possibly a strict subset, and therefore present a version of the algorithm  
366 that projects iterates back to  $\Theta$ , provided a projection operator  $\mathcal{P}_\Theta$  (see Algorithm 3); when  $\Theta = \mathbb{R}^D$ ,  
367 i.e. is unbounded, the operator reduces to identity mapping so Algorithm 3 reduces to Algorithm 1 in  
368 the main paper. Note that this projection operator is usually cheap for the common choices of  $\Theta$ : for  
369 example, for the sake of regularization in practice (e.g., ridge-type regularization), often  $\Theta$  is an  $\ell_2$   
370 unit ball, whereby  $\mathcal{P}_\Theta(\theta) = \theta / \max\{1, \|\theta\|\}$ .

371 For the convergence analysis, we need the following definitions.

372 **Definition 4** (Key Lipschitz Parameters). Let  $\rho \doteq \|\theta_0 - \tilde{\theta}_{PQ}\|$ . We then define

$$\begin{aligned} \hat{G}_\theta &= \sup \left\{ \|\nabla\ell(\theta; x, y)\| : \|\theta - \tilde{\theta}_{PQ}\|^2 \leq 2\rho^2, (x, y) \in S_{PQ}, \right. \\ &\quad \left. \|\theta\| \leq \frac{1 + \log(T + \kappa)}{m_1} \sup_{(x', y') \in S_Q} \|\nabla\ell(\theta_{Q,0}; x', y')\| \right\}, \\ \hat{G}_\lambda &= \sup \left\{ |\ell(\theta; x, y) - \ell(\theta'; x, y) - 3\epsilon_Q| : \|\theta - \tilde{\theta}_{PQ}\|^2 \leq 2\rho^2, (x, y) \in S_{PQ}, \right. \\ &\quad \left. \|\theta'\| \leq \frac{1 + \log(T + \kappa)}{m_1} \sup_{(x', y') \in S_Q} \|\nabla\ell(\theta_{Q,0}; x', y')\| \right\}. \end{aligned}$$

373 The above definition captures the Lipschitzness of the risk function on the iterates generated during  
374 our algorithm proceeding.

375 **Definition 5** (See [6]). For  $\epsilon > 0$ , let  $r(\epsilon) \doteq \inf \left\{ \|\nabla\hat{R}_Q(\theta)\|^2 : \theta \in \Theta, \hat{R}_Q(\theta) - \hat{R}_Q(\hat{\theta}_Q) = \epsilon \right\}$ .

376 This notion is used to control the distance between the return solution and solution before the last  
377 projection step, i.e.,  $\|\theta_T - \hat{\theta}_{PQ}\|$  where  $\theta_T \doteq \frac{1}{T} \sum_{t=0}^{T-1} \theta_t$ . In linear regression, we can explicitly  
378 compute it as  $r(\epsilon) = \epsilon \cdot \lambda_{\min}^+(\hat{\Sigma}_Q)$ .

**Theorem 4** (Strongly Convex and Smooth Result). Let  $\rho^2 = \|\theta_0 - \tilde{\theta}_{PQ}\|^2$ ,  $\tau \leq 0.1$ , and  $\sigma_{PQ}^2, c_\eta$  be some positive numbers such that

$$\sigma_{PQ}^2 \leq 256 (1 + (\lambda^*)^2 + \rho^2) \hat{G}_\theta^2, \text{ and } c_\eta \leq \min \left\{ \frac{\rho}{2\sqrt{2}\hat{G}_\lambda}, \frac{\rho}{16\sqrt{6}\sigma_{PQ}\sqrt{\log 2/\tau}}, \frac{\rho}{C_{PQ}} \right\},$$

where  $C_{PQ} = 2m_1(1 + 2\kappa) \left( \frac{1}{m_1^2} \|\nabla \hat{R}_Q(\theta_{Q,0})\|^2 + \|\theta_{Q,0}\|^2 \right) + \frac{6\sigma_Q^2 \log(2/\tau)}{m_1}$ , for  $\sigma_Q^2 = \left( \frac{\log(T+2\kappa)}{m_1} \sup_{(x,y) \in S_Q} \|\nabla \ell(\theta_{Q,0}; x, y)\| \right)^2$ .

Assume the parameters in Algorithm 3 are set as  $\eta = \frac{c_\eta}{\sqrt{T}}$ ,  $\gamma = \frac{\hat{G}_\theta c_\eta}{\sqrt{T}}$ ,  $\alpha_t = \frac{1}{m_1} \cdot \frac{1}{t+2\kappa}$ . Suppose  $T \geq \max \left\{ \frac{C_{PQ} \log T}{\epsilon_Q}, \left( \frac{C_{PQ} (\log(T+2\kappa))^2}{\hat{G}_\lambda \sqrt{\log 1/\tau}} \right)^2 \right\}$  and  $r(2\epsilon_Q) \leq 1$ , then, with probability at least  $1 - \tau$  over the randomness of Algorithm 3, the empirical risk of the returned solution satisfies:

$$\hat{R}_P(\hat{\theta}_{PQ}) - \hat{R}_P(\tilde{\theta}_{PQ}) \lesssim \left( \hat{G}_\theta + \hat{G}_\lambda \sqrt{\log \frac{1}{\tau}} \right) \cdot \left( \frac{\frac{\hat{G}_\theta^2}{c_\eta} + \hat{G}_\theta \hat{G}_\lambda \sqrt{\log \frac{1}{\tau}}}{r(2\epsilon_Q) \sqrt{T}} + \frac{\lambda^* \hat{G}_\lambda \sqrt{\log \frac{1}{\tau}} + \frac{\rho^2}{c_\eta}}{\sqrt{T}} \right).$$

**Statistical Implications.** In this section we give an example of how the above Theorem 4 can be converted generically to statistical guarantees on transfer (as was done for the linear regression case).

For intuition, Theorem 4 guarantees that  $\hat{R}_P(\hat{\theta}_{PQ})$  is small, i.e., close to  $\hat{R}_P(\tilde{\theta}_{PQ})$ , while we also know  $\hat{R}_Q(\hat{\theta}_{PQ})$  is also small, i.e., close to  $\hat{R}_Q(\hat{\theta}_Q)$  (since  $\hat{R}_P(\hat{\theta}_{PQ})$  is a projection of the average iterate onto the constraint set centered at  $\hat{\theta}_{Q,T}$ ). Thus, if in addition, we have concentration of empirical risks to true risks, we can convert the guarantees of Theorem 4 to statistical transfer guarantees.

The results below illustrate the above intuition. These results are expressed in terms of generic relations between  $P$  and  $Q$  risks given as follows.

**Definition 6** (Weak Modulus [5]). Given  $\epsilon > 0$ , we define the modulus

$$\delta(\epsilon) \doteq \sup \{ \mathcal{E}_Q(\theta) : \mathcal{E}_P(\theta) \leq \epsilon, \theta \in \Theta \}.$$

In words, the weak modulus captures the best achievable  $Q$  risk, if the learner only has access to  $P$ 's data. For instance, in linear regression, as explained in the main paper and shown in [5] it can be upper bounded as  $\delta(\epsilon) \leq 2\lambda_{\max}(\Sigma_P^{-1} \Sigma_Q) \cdot \epsilon + 2\mathcal{E}_Q(\theta_P^*)$ .

We next consider some traditional concentration results for bounded losses in terms of the Rademacher complexity of the loss class.

**Assumption 4** (Boundedness of Loss). We assume  $\ell(\theta; x, y) \leq M_\ell$  for any  $\theta \in \Theta$ ,  $(x, y) \in \mathcal{X} \times \mathcal{Y}$ .

**Remark 3.** The Assumption 4 hold for a strongly convex loss given that the parameter  $\theta$ 's norm is bounded, e.g.,  $\|\theta\| \leq B$ ,  $\forall \theta \in \Theta$ . For example, in linear regression, if we assume the label space  $\mathcal{Y} \subseteq [-M_y, M_y]$ , then  $\ell(\theta; x, y) = (\theta^\top x - y)^2 \leq 2B^2 M_x^2 + 2M_y^2$ .

We then introduce the Rademacher complexity which characterizes the complexity of a class and will be used to derive uniform convergence result.

**Definition 7** (Rademacher complexity). Let  $\mathcal{F}$  be a family of functions mapping from  $\mathcal{Z}$  to  $\mathbb{R}$  and  $Z = \{z_1, \dots, z_n\}$  be the i.i.d. samples drawn from distribution  $\mu$ . Then, the empirical Rademacher complexity of  $\mathcal{F}$  with respect to dataset  $Z$  is defined as

$$\hat{\mathcal{R}}_n(\mathcal{F}) \doteq \mathbb{E}_{\epsilon \in \{\pm 1\}^n} \left[ \sup_{f \in \mathcal{F}} \frac{1}{n} \sum_{i=1}^n \epsilon_i f(z_i) \right],$$

where  $\epsilon_1, \dots, \epsilon_n$  are i.i.d. Rademacher random variables with  $\mathbb{P}\{\epsilon_i = 1\} = \mathbb{P}\{\epsilon_i = -1\} = 1/2$ . Then Rademacher complexity  $R_n(\mathcal{F})$  is defined as  $R_n(\mathcal{F}) \doteq \mathbb{E} \hat{\mathcal{R}}_n(\mathcal{F})$

**Assumption 5** (Bounded Rademacher Complexity of Loss Class). We assume  $\mathcal{R}_n(\ell \circ \mathcal{H}) \leq \frac{B_{\mathcal{H}, \ell}}{\sqrt{n}}$  for some positive real number  $B_{\mathcal{H}, \ell}$  which characterizes the complexity of the loss class  $\ell \circ \mathcal{H}$ .

414 **Remark 4.** The Assumption 5 is standard. Here we give some examples.

415 For linear classifier class  $\mathcal{H} \doteq \{x \mapsto \theta^\top x : \theta \in \mathbb{R}^d, \|\theta\| \leq B\}$  with  $L$ -Lipschitz loss, the bound [23,  
416 Lemma 26.10] is given by  $\mathcal{R}_n(\ell \circ \mathcal{H}) \leq \frac{LBM_x}{\sqrt{n}}$ .

417 For  $l$  layer neural network class  $\mathcal{H} \doteq \{x \mapsto W_l \sigma(W_{l-1} \dots \sigma(W_1 x)) : \|W_j\|_F \leq B_j\}$  with  $L$ -  
418 Lipschitz loss, the bound [24, Theorem 1] is given by

$$\mathcal{R}_n(\ell \circ \mathcal{H}) \lesssim \frac{LM_x \sqrt{l} \prod_{j=1}^l B_j}{\sqrt{n}}.$$

419 For general VC class  $\mathcal{H} \subseteq \{-1, 1\}^{\mathcal{X}}$  with VC dimension  $d$ , the bound [25, Corollary 3.8] is given by  
420  $\mathcal{R}_n(\ell \circ \mathcal{H}) \lesssim \sqrt{\frac{d \log n}{n}}$ .

421 With the above two assumptions we can derive the following rate of uniform convergence.

422 **Proposition 1** (Uniform Convergence). *Let  $\mu$  denote either  $P$  or  $Q$ . With probability at least  $1 - \tau$ ,*  
423 *the following statement holds:*

$$\sup_{h \in \mathcal{H}} |R_\mu(\theta) - \hat{R}_\mu(\theta)| \leq 2 \frac{B_{\mathcal{H}, \ell}}{\sqrt{n_\mu}} + M_\ell \sqrt{\frac{\log \frac{2}{\tau}}{2n_\mu}}.$$

**Corollary 1** (Statistical Transfer Guarantees). *Let*

$$\epsilon_P = 2 \frac{B_{\mathcal{H}, \ell}}{\sqrt{n_P}} + M_\ell \sqrt{\frac{\log \frac{2}{\tau}}{2n_P}}, \epsilon_Q = 2 \frac{B_{\mathcal{H}, \ell}}{\sqrt{n_Q}} + M_\ell \sqrt{\frac{\log \frac{2}{\tau}}{2n_Q}}.$$

424 *Then with probability at least  $1 - 3\tau$  over the randomness of Algorithm 3 and  $S_P$  and  $S_Q$ , the*  
425 *returned solution satisfies*

$$\mathcal{E}_Q(\hat{\theta}_{PQ}) \leq 5 \cdot \min \{\epsilon_Q, \delta(3\epsilon_P)\},$$

426 *provided a number of iterations*

$$T \gtrsim \left( \hat{G}_\theta + \hat{G}_\lambda \sqrt{\log \frac{1}{\tau}} \right)^2 \cdot \left( \frac{\frac{\hat{G}_\theta^2}{c_\eta} + \hat{G}_\theta \hat{G}_\lambda \sqrt{\log \frac{1}{\tau}}}{r(2\epsilon_Q)\epsilon_P} + \frac{\lambda^* \hat{G}_\lambda \sqrt{\log \frac{1}{\tau}} + \frac{\rho^2}{c_\eta}}{\epsilon_P} \right)^2.$$

427 Here we achieve a transfer guarantee similar to that in Theorem 1. The rate is still adaptive—it  
428 achieves the better rate between solely target ERM and source ERM. The required iteration number  
429 depends on the  $\epsilon_P$  and  $r(\epsilon_Q)$ , also similar to that in Theorem 1.

430

## 431 9 Additional Experiments

432 In this section we provide additional experimental results.

### 433 9.1 Regression Task on the Berkeley Yearbook Dataset.

434 We conduct experiments on the Berkeley Yearbook Dataset [26]. The dataset contains the gray-scale  
435 portraits taken in different years. The input  $x$  is the 512-dimensional vector feature extracted by  
436 ResNet18, and  $y$  is the year the photo is taken (ranging from 1905 to 2013). We construct source  
437 and target tasks by varying the proportion of male and female photos. In the source dataset, 50% of  
438 the samples are drawn from male photos and 50% from female photos. For the target training and  
439 testing dataset, the ratio is adjusted to 75% male and 25% female. We fix  $n_Q = 100$  and vary  $n_P$   
440 from 500 to 1300. Due to the difficulty of the task and the limited target data, the target ERM model  
441 suffers from very large errors and is therefore omitted from Figure 5. We report the MSE comparison  
442 with source ERM and HTL, as well as a runtime comparison with HTL. We can see from the left

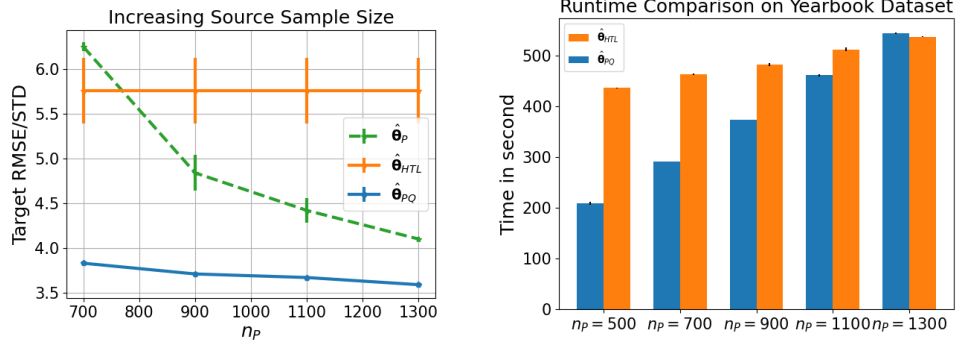

Figure 5: Linear regression on the Yearbook dataset. Input features of dimension 512 are extracted by ResNet18. (Left) Q excess risk. (Right) Runtime comparison. HTL ( $\hat{\theta}_{HTL}$ ) has difficulty to adapt to the situation where source data are more helpful and results in large target error, while our algorithm ( $\hat{\theta}_{PQ}$ ) gains from source data and significantly outperforms the competitors.

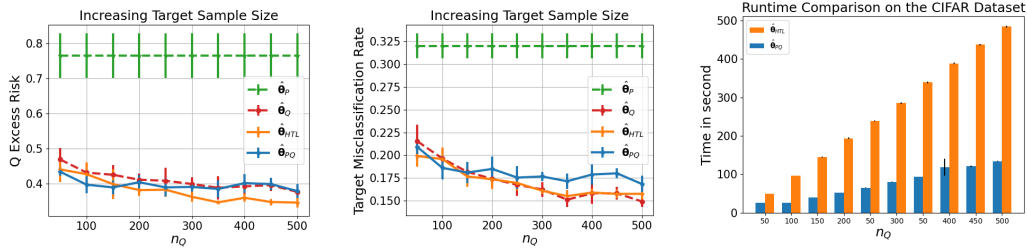

Figure 6: Binary Classification on the CIFAR10 Dog vs Cat dataset. We fix  $n_P = 100$  and increase  $n_Q$  gradually. (Left) Target excess risk (Middle) Target misclassification rate. (Right) Runtime comparison. Our method ( $\hat{\theta}_{PQ}$ ) is still comparable with target ERM. HTL ( $\hat{\theta}_{HTL}$ ) slightly outperforms ours, but as  $n_Q$  increases, the runtime of HTL dramatically increases.

sub-figure that our method can consistently outperform source ERM, target ERM and HTL, and can *automatically adapt* to the better rate of source and target ERM learning. The right sub-figure shows that our algorithm achieves superior runtime performance compared to HTL when  $n_P < 1300$ , while when  $n_P$  reaches 1300, HTL becomes the faster one. This difference arises from the inherent nature of the two algorithms: our method primarily optimizes over the source data, so the total number of iterations increases with  $n_P$  grows, In contrast, HTL focuses on optimizing over the target data, using the source data only to compute a reference model. As a result, its runtime remains relatively stable as  $n_P$  increases.

## 9.2 More Results on CIFAR10 Dog vs Cat dataset

Here we provide more results on CIFAR10. To verify the adaptivity of the algorithm with increasing target samples, we conduct the experiment with fixed  $n_P = 100$  and gradually increasing  $n_Q$  from 50 to 500. We set the source dataset to be 80% dog samples and 20% cat samples, and the ratio for target is adjusted to 50% dog and 50% cat. As we can see from Figure 6, in this setting source data are not informative so the source ERM performs poorly. As the target sample size increases, the target ERM can give promising performance, and our method can also adapt to it. HTL performs the best in this setting, but its runtime dramatically increases as the target sample size increases.

## 10 Missing Proofs in Section 4.1

In this section, we provide the missing proofs in Section 4.1. We first introduce the following helper lemma that lower bounds the norm of the constraint gradient on the boundard of the constraint set.

462 **Lemma 8** (Lower and upper bound of boundary gradient). *For any  $\epsilon > 0$ , the following statements*  
 463 *hold:*

$$\min_{\theta: \hat{R}_Q(\theta) - \hat{R}_Q(\hat{\theta}_Q) = \epsilon} \left\| \nabla \hat{R}_Q(\theta) \right\|^2 = \epsilon \lambda_{\min}^+(\hat{\Sigma}_Q).$$

464 *Proof.* We start by proving the first statement. First, the  $\theta$  on the boundary of the constraint set  
 465 satisfies:  $\left\| \theta - \hat{\theta}_Q \right\|_{\hat{\Sigma}_Q}^2 = \epsilon$ . We first decompose  $\theta$  as  $\theta = \theta' + \theta^\perp$  where  $\theta' \in \text{Range}(\hat{\Sigma}_Q)$  and  $\theta^\perp$  is  
 466 in the null space of  $\hat{\Sigma}_Q$ .

467 Now we examine the gradient norm:

$$\begin{aligned} \min_{\theta: \hat{R}_Q(\theta) - \hat{R}_Q(\hat{\theta}_Q) = \epsilon} \left\| \nabla \hat{R}_Q(\theta) \right\|^2 &= \min_{\left\| \theta - \hat{\theta}_Q \right\|_{\hat{\Sigma}_Q}^2 = \epsilon} \left\| \hat{\Sigma}_Q(\theta - \hat{\theta}_Q) \right\|^2 \\ &= \min_{\left\| \theta' - \hat{\theta}_Q \right\|_{\hat{\Sigma}_Q}^2 = \epsilon, \theta' \in \text{Range}(\hat{\Sigma}_Q)} \left\| \hat{\Sigma}_Q(\theta' - \hat{\theta}_Q) \right\|^2 \\ &= \min_{\mathbf{u} \in \text{Range}(\hat{\Sigma}_Q), \|\mathbf{u}\|=1} \left\| \sqrt{\epsilon} \hat{\Sigma}_Q^{\frac{1}{2}} \mathbf{u} \right\|^2 = \epsilon \lambda_{\min}^+(\hat{\Sigma}_Q). \end{aligned}$$

468 □

469 **Proof of Lemma 1:**

470 *Proof.* Due to Jensen's inequality, we have that  $\left\| \theta_0 - \tilde{\theta}_{PQ} \right\|^2 \leq 2 \left\| \theta_0 - \hat{\theta}_P \right\|^2 + 2 \left\| \hat{\theta}_P - \tilde{\theta}_{PQ} \right\|^2$ ,  
 471 which is at most

$$\frac{1}{2\lambda_{\min}^2(\hat{\Sigma}_P)} \left\| \nabla \hat{R}_P(\theta_0) \right\|^2 + 2 \left\| \hat{\theta}_P - \tilde{\theta}_{PQ} \right\|^2 \leq \frac{\left\| \nabla \hat{R}_P(\theta_0) \right\|^2}{2\lambda_{\min}^2(\hat{\Sigma}_P)} + \frac{2 \left\| \hat{\theta}_P - \tilde{\theta}_{PQ} \right\|_{\hat{\Sigma}_P}^2}{\lambda_{\min}(\hat{\Sigma}_P)}.$$

472 Since  $\tilde{\theta}_{PQ}$  is the minimizer of  $\hat{R}_P$  within constraint set, and  $\hat{\theta}_Q$  is also in the constraint set, we have

$$\left\| \hat{\theta}_P - \tilde{\theta}_{PQ} \right\|_{\hat{\Sigma}_P}^2 \leq \left\| \hat{\theta}_P - \hat{\theta}_Q \right\|_{\hat{\Sigma}_P}^2 \leq \frac{\left\| \nabla \hat{R}_P(\hat{\theta}_Q) \right\|^2}{4\lambda_{\min}(\hat{\Sigma}_P)}.$$

473 Putting pieces together we have

$$\left\| \theta_0 - \tilde{\theta}_{PQ} \right\|^2 \leq \frac{\left\| \nabla \hat{R}_P(\theta_0) \right\|^2}{2\lambda_{\min}^2(\hat{\Sigma}_P)} + \frac{\left\| \nabla \hat{R}_P(\hat{\theta}_Q) \right\|^2}{2\lambda_{\min}^2(\hat{\Sigma}_P)}.$$

474 □

475 **Proof of Lemma 2:**

476 *Proof.* For  $\theta$  such that  $\left\| \theta - \tilde{\theta}_{PQ} \right\|^2 \leq 2\rho^2$ , we examine the upper bound of its norm. According to  
 477 triangle inequality we have:

$$\left\| \theta \right\| \leq \sqrt{2\rho} + \left\| \tilde{\theta}_{PQ} \right\| \leq 3\rho.$$

478 The rest of the proof follows:

$$\left\| \nabla \ell(\theta; x, y) \right\| = \left\| x(\theta^\top x - y) \right\| \leq M_x^2 \left\| \theta \right\| + M_x \hat{M}_y.$$

479 □



480 **Proof of Lemma 3:**

481 *Proof.* The proof simply follows the definition of  $\ell$ :

$$\begin{aligned}
|\ell(\theta; x, y) - \ell(\theta'; x, y) - 6\epsilon_Q| &\leq (\theta^\top x - y)^2 + (\theta'^\top x - y)^2 + 6\epsilon_Q \\
&\leq 2M_x^2 \|\theta\|^2 + 2\hat{M}_y + 2M_x^2 \|\theta'\|^2 + \epsilon_Q \\
&\leq 18 \left( M_x^2 \rho^2 + \hat{M}_y + \frac{M_x^4 \hat{M}_y^2 (1 + \log(T + 2\kappa_Q))^2}{(\lambda_{\min}^+(\hat{\Sigma}_Q))^2} \right) + 6\epsilon_Q.
\end{aligned}$$

482

□

483 **Proof of Lemma 4:**

484 *Proof.* Due to the first order optimality condition we have

$$\nabla \hat{R}_P(\tilde{\theta}_{PQ}) + \lambda^* \nabla \hat{R}_Q(\tilde{\theta}_{PQ}) = 0 \implies \lambda^* = \frac{\|\nabla \hat{R}_P(\tilde{\theta}_{PQ})\|}{\|\nabla \hat{R}_Q(\tilde{\theta}_{PQ})\|}.$$

485 To upper bound  $\|\nabla \hat{R}_P(\tilde{\theta}_{PQ})\|$  we notice that

$$\begin{aligned}
\|\nabla \hat{R}_P(\tilde{\theta}_{PQ})\| &= \|2\hat{\Sigma}_P(\tilde{\theta}_{PQ} - \hat{\theta}_P)\| \\
&\leq 2\sqrt{\lambda_{\max}(\hat{\Sigma}_P)} \|\hat{\Sigma}_P^{1/2}(\tilde{\theta}_{PQ} - \hat{\theta}_P)\| = 2\sqrt{\lambda_{\max}(\hat{\Sigma}_P)} \sqrt{\hat{R}_P(\tilde{\theta}_{PQ}) - \hat{R}_P(\hat{\theta}_P)}.
\end{aligned}$$

486 Define  $\theta'$  to be the model on the boundary of constraint set, and also on the range of  $\hat{\Sigma}_Q$ . That is,

487  $\|\theta' - \hat{\theta}_Q\|_{\hat{\Sigma}_Q}^2 = 6\epsilon_Q$  and  $\theta' \in \text{Range}(\hat{\Sigma}_Q)$ . Since  $\tilde{\theta}_{PQ}$  is the minimizer of  $\hat{R}_P(\cdot)$  in the constraint  
488 set, we know that

$$\begin{aligned}
\|\nabla \hat{R}_P(\tilde{\theta}_{PQ})\| &\leq 2\sqrt{\lambda_{\max}(\hat{\Sigma}_P)} \sqrt{\hat{R}_P(\theta') - \hat{R}_P(\hat{\theta}_P)} \\
&= 2\sqrt{\lambda_{\max}(\hat{\Sigma}_P)} \|\hat{\Sigma}_P^{1/2}(\theta' - \hat{\theta}_P)\| \\
&\leq 2\lambda_{\max}(\hat{\Sigma}_P) \|\theta' - \hat{\theta}_P\| \\
&\leq 2\lambda_{\max}(\hat{\Sigma}_P) \|\theta' - \hat{\theta}_Q\| + 2\lambda_{\max}(\hat{\Sigma}_P) \|\hat{\theta}_Q - \hat{\theta}_P\| \\
&\leq 2\lambda_{\max}(\hat{\Sigma}_P) \frac{1}{\sqrt{\lambda_{\min}^+(\hat{\Sigma}_Q)}} \|\hat{\Sigma}_Q^{1/2}(\theta' - \hat{\theta}_Q)\| + 2\lambda_{\max}(\hat{\Sigma}_P) \|\hat{\theta}_Q - \hat{\theta}_P\| \\
&= \frac{2\lambda_{\max}(\hat{\Sigma}_P)}{\sqrt{\lambda_{\min}^+(\hat{\Sigma}_Q)}} \cdot \sqrt{6\epsilon_Q} + 2\lambda_{\max}(\hat{\Sigma}_P) \|\hat{\theta}_Q - \hat{\theta}_P\|.
\end{aligned}$$

489 To lower bound  $\|\nabla \hat{R}_Q(\tilde{\theta}_{PQ})\|$ , we again evoke Lemma 8 that  $\|\nabla \hat{R}_Q(\tilde{\theta}_{PQ})\| \geq 2\sqrt{\lambda_{\min}^+(\hat{\Sigma}_Q)} \cdot 6\epsilon_Q$ .

490 Putting pieces together will conclude the proof.

491

□

492 **11 Missing Proofs in Section 5.2**

493 **Proof of Lemma 5:**

494 *Proof.* The proof mainly follows Proposition 8 of [5]. With probability at least  $1 - 2\tau$ , the following  
 495 two facts hold. For one hand, for any  $\theta \in \left\{ \theta : \left\| \theta - \hat{\theta}_Q \right\|_{\hat{\Sigma}_Q}^2 \leq 6\epsilon_Q \right\}$ , we know

$$\mathcal{E}_Q(\theta) = \left\| \theta - \theta_Q^* \right\|_{\Sigma_Q}^2 \leq 2 \left\| \theta - \hat{\theta}_Q \right\|_{\Sigma_Q}^2 + 2 \left\| \theta_Q^* - \hat{\theta}_Q \right\|_{\Sigma_Q}^2 \leq 4 \left\| \theta - \hat{\theta}_Q \right\|_{\hat{\Sigma}_Q}^2 + 2\epsilon_Q \leq 26\epsilon_Q.$$

496 where at the second inequality we evoke the matrix concentration result from Lemma 3 of [5]. For  
 497 the other hand, for any  $\theta$  such that  $\mathcal{E}_Q(\theta) \leq \epsilon_Q$ , we have

$$\left\| \theta - \hat{\theta}_Q \right\|_{\hat{\Sigma}_Q}^2 \leq \frac{3}{2} \left\| \theta - \hat{\theta}_Q \right\|_{\Sigma_Q}^2 \leq 3 \left\| \theta - \theta_Q^* \right\|_{\Sigma_Q}^2 + 3 \left\| \hat{\theta}_Q - \theta_Q^* \right\|_{\Sigma_Q}^2 \leq 6\epsilon_Q.$$

498 □

#### 499 **Proof of Lemma 6:**

500 *Proof.* First notice the following decomposition:  $\left\| \theta - \theta_P^* \right\|_{\Sigma_P}^2 \leq 2 \left\| \theta - \tilde{\theta}_{PQ} \right\|_{\Sigma_P}^2 +$   
 501  $2 \left\| \tilde{\theta}_{PQ} - \theta_P^* \right\|_{\Sigma_P}^2$ . For the first term in RHS of above inequality, with probability at least  $1 - \tau$ , we  
 502 have

$$2 \left\| \theta - \tilde{\theta}_{PQ} \right\|_{\Sigma_P}^2 \leq 4 \left\| \theta - \tilde{\theta}_{PQ} \right\|_{\hat{\Sigma}_P}^2 = 4 \left( \hat{R}_P(\theta) - \hat{R}_P(\tilde{\theta}_{PQ}) - \left\langle \nabla \hat{R}_P(\tilde{\theta}_{PQ}), \theta - \tilde{\theta}_{PQ} \right\rangle \right).$$

503 Since both  $\theta$  and  $\tilde{\theta}_{PQ}$  are in the constraint set of Problem (2), and  $\tilde{\theta}_{PQ}$  is the optimal solution  
 504 within the set, we know  $\left\langle \nabla \hat{R}_P(\tilde{\theta}_{PQ}), \theta - \tilde{\theta}_{PQ} \right\rangle \geq 0$ . Hence, we know  $2 \left\| \theta - \tilde{\theta}_{PQ} \right\|_{\Sigma_P}^2 \leq$   
 505  $4 \left( \hat{R}_P(\theta) - \hat{R}_P(\tilde{\theta}_{PQ}) \right)$ .

506 Now we proceed to bounding  $2 \left\| \tilde{\theta}_{PQ} - \theta_P^* \right\|_{\Sigma_P}^2$ . Notice that with probability at least  $1 - 2\tau$

$$\begin{aligned} 2 \left\| \tilde{\theta}_{PQ} - \theta_P^* \right\|_{\Sigma_P}^2 &\leq 4 \left\| \tilde{\theta}_{PQ} - \hat{\theta}_P \right\|_{\Sigma_P}^2 + 4 \left\| \hat{\theta}_P - \theta_P^* \right\|_{\Sigma_P}^2 \\ &\leq 8 \left\| \tilde{\theta}_{PQ} - \hat{\theta}_P \right\|_{\hat{\Sigma}_P}^2 + 4 \left\| \hat{\theta}_P - \theta_P^* \right\|_{\Sigma_P}^2 \\ &\leq 8 \left\| \theta_P^* - \hat{\theta}_P \right\|_{\hat{\Sigma}_P}^2 + 4 \left\| \hat{\theta}_P - \theta_P^* \right\|_{\Sigma_P}^2 \\ &\leq 12 \left\| \theta_P^* - \hat{\theta}_P \right\|_{\Sigma_P}^2 + 4 \left\| \hat{\theta}_P - \theta_P^* \right\|_{\Sigma_P}^2 \\ &\leq 16\epsilon_P, \end{aligned}$$

507 where at second and fourth step we evoke matrix concentration result from Lemma 3 of [5], at third  
 508 step we use the fact that  $\tilde{\theta}_{PQ}$  is the optimal solution within the set. Putting pieces together will  
 509 conclude the proof. □

#### 510 **Proof of Lemma 7:**

511 *Proof.* Since  $\theta_P^* \notin \left\{ \theta : \left\| \theta - \hat{\theta}_Q \right\|_{\hat{\Sigma}_Q}^2 \leq 6\epsilon_Q \right\}$ , then from Lemma 5 we know with probability at  
 512 least  $1 - 2\tau$ ,  $\mathcal{E}_Q(\theta_P^*) \geq \epsilon_Q \geq \frac{1}{26} \mathcal{E}_Q(\theta)$  holds. □

## 513 **12 Proof of Convergence**

514 In this section we will present the proof of the convergence result. We first introduce some useful  
 515 lemmas.

## 516 12.1 Technical Lemmas

517 The following proposition is standard and will be used to show the sub-gaussianity of the stochastic  
518 gradients.

519 **Proposition 2.** *Given a random variable  $X$ , if  $a \leq X \leq b$  with probability 1, then  $X$  is a  $\frac{(b-a)^2}{4}$   
520 sub-Gaussian random variable.*

521 The next lemma establishes the convergence of  $\theta_{Q,t}$ .

522 **Lemma 9** (High probability convergence of  $\theta_{Q,t}$ ). *If we choose  $\alpha_t = \frac{1}{\lambda_{\min}^+(\hat{\Sigma}_Q)(t+2\kappa_Q)}$ , then with  
523 probability at least  $1 - \tau$ , for any  $t \geq 0$  we have:*

$$\hat{R}_Q(\theta_{Q,t}) - \hat{R}_Q(\hat{\theta}_Q) \leq \frac{\lambda_{\min}^+(\hat{\Sigma}_Q)(1+2\kappa_Q) \|\hat{\theta}_Q\|^2}{t+2\kappa_Q} + \frac{6\sigma_Q^2 \log(2/\tau)(\log t + 1)}{\lambda_{\min}^+(\hat{\Sigma}_Q)(t+2\kappa_Q)}$$

524 for  $\sigma_Q^2 = \left( M_x^2 \left( \frac{1+\log(T+2\kappa_Q)}{\lambda_{\min}^+(\hat{\Sigma}_Q)} M_x M_y \right) + M_x M_y \right)^2$ .

525 *Proof.* We first examine the boundedness of  $\|\theta_{Q,t}\|$ . According to updating rule of  $\theta_{Q,t}$  we have

$$\begin{aligned} \|\theta_{Q,t}\| &= \|\theta_{Q,t-1} - \alpha_t x_t (x_t^\top \theta_{Q,t-1} - y_t)\| \\ &\leq \|(\mathbf{I} - \alpha_t x_t x_t^\top) \theta_{Q,t-1}\| + \alpha_t \|x_t y_t\| \\ &\leq \underbrace{\|\theta_{Q,0}\|}_{=0} + \sum_{s=1}^t \frac{1}{\lambda_{\min}^+(\hat{\Sigma}_Q)(s+2\kappa_Q)} M_x \hat{M}_y \\ &\leq \frac{1 + \log(t+2\kappa_Q)}{\lambda_{\min}^+(\hat{\Sigma}_Q)} M_x M_y. \end{aligned} \tag{8}$$

526 Hence we can compute the sub-Gaussian parameter. Notice that

$$\begin{aligned} \|\nabla \ell(\theta_{Q,t}; x_t, y_t) - \nabla \hat{R}_Q(\theta_{Q,t})\| &\leq \|x_t x_t^\top - \hat{\Sigma}_Q\| \|\theta_{Q,t}\| + \left\| x_t y_t - \frac{1}{n_Q} \mathbf{X}_Q^\top \mathbf{y}_Q \right\| \\ &\leq 2M_x^2 \left( \frac{1 + \log(t+2\kappa_Q)}{\lambda_{\min}^+(\hat{\Sigma}_Q)} M_x M_y \right) + 2M_x \hat{M}_y \\ &\leq 2M_x^2 \left( \frac{1 + \log(T+2\kappa_Q)}{\lambda_{\min}^+(\hat{\Sigma}_Q)} M_x M_y \right) + 2M_x \hat{M}_y. \end{aligned}$$

527 According to Proposition 2, we know  $\|\nabla \ell(\theta_{Q,t}; x_t, y_t) - \nabla \hat{R}_Q(\theta_{Q,t})\|$  is

528  $\left( M_x^2 \left( \frac{1+\log(t+2\kappa_Q)}{\lambda_{\min}^+(\hat{\Sigma}_Q)} M_x M_y \right) + M_x M_y \right)^2$  sub-Gaussian.

529 Now, we evoke the result from Theorem 3.7 from [27] that if the gradient noise is  $\sigma_Q$  sub-Gaussian,  
530 then with our choice of  $\alpha_t$ , with probability at least  $1 - \tau$  it holds for any integer  $t > 0$  that

$$\hat{R}_Q(\theta_{Q,t}) - \hat{R}_Q(\hat{\theta}_Q) \leq \frac{\lambda_{\min}^+(\hat{\Sigma}_Q)(1+2\kappa_Q) \|\hat{\theta}_Q\|^2}{t+2\kappa_Q} + \frac{6\sigma_Q^2 \log(2/\tau)(\log t + 1)}{\lambda_{\min}^+(\hat{\Sigma}_Q)(t+2\kappa_Q)}.$$

531 □

532 The next lemma proves the sub-Gaussianity of the stochastic gradient used to update  $\theta_t$ .

**Lemma 10.** *Let*

$$g_\theta = \begin{cases} (1+\lambda) \nabla \ell(\theta; x, y), (x, y) \sim S_P, w.p. \frac{1}{1+\lambda} \\ (1+\lambda) \nabla \ell(\theta; x, y), (x, y) \sim S_Q, w.p. \frac{\lambda}{1+\lambda} \end{cases}$$

and

$$\delta = \left\| \nabla \hat{R}_P(\theta) + \lambda \nabla \hat{R}_Q(\theta) - g_\theta \right\|.$$

533 Then for any  $\theta \in \left\{ \theta : \|\theta - \tilde{\theta}_{PQ}\|^2 \leq 2\rho^2 \right\}$  and  $\lambda \in \left\{ \lambda : (\lambda - \lambda^*)^2 \leq 2\rho^2 \right\}$ , we have  
 534  $\mathbb{E}[\exp(\delta^2/\sigma_{PQ}^2)] \leq \exp(1)$  for  $\sigma_{PQ}^2 = 256(1 + (\lambda^*)^2 + \rho^2) \hat{G}_\theta^2$ .

535 *Proof.* We use  $\xi = 1$  to denote the event that we sample from  $P$ , and otherwise from  $Q$ . For  
 536 notational convenience we define  $\delta_\mu \doteq \|\nabla \hat{R}_\mu(\theta) - \nabla \ell(\theta; x, y)\|$  where  $x, y$  is sampled from  
 537  $\mu$ , for  $\mu$  denoting either  $P$  or  $Q$ . We also define  $\zeta_{PQ} \doteq \left\| \nabla \hat{R}_P(\theta) - \nabla \hat{R}_Q(\theta) \right\|$ . Since  
 538  $\delta = \left\| \nabla \hat{R}_P(\theta) + \lambda \nabla \hat{R}_Q(\theta) - (1 + \lambda)(\mathbb{I}\{\xi = 1\} \nabla \ell(\theta; x, y) + \mathbb{I}\{\xi = 0\} \nabla \ell(\theta; x, y)) \right\|$ , we can  
 539 verify that

$$\begin{aligned} & \mathbb{E} \exp(\delta^2/\sigma_{PQ}^2) \\ &= \frac{1}{1 + \lambda} \mathbb{E} \exp \left( \left\| \nabla \hat{R}_P(\theta) + \lambda \nabla \hat{R}_Q(\theta) - (1 + \lambda) \nabla \ell(\theta; x, y) \right\|^2 / \sigma_{PQ}^2 \right) \\ & \quad + \frac{\lambda}{1 + \lambda} \mathbb{E} \exp \left( \left\| \nabla \hat{R}_P(\theta) + \lambda \nabla \hat{R}_Q(\theta) - (1 + \lambda) \nabla \ell(\theta; x, y) \right\|^2 / \sigma_{PQ}^2 \right) \\ &\leq \frac{1}{1 + \lambda} \mathbb{E} \exp \left( \frac{2(1 + \lambda)^2 \delta_P^2}{\sigma_{PQ}^2} + \frac{2\lambda^2 \zeta_{PQ}^2}{\sigma_{PQ}^2} \right) + \frac{\lambda}{1 + \lambda} \mathbb{E} \exp \left( \frac{2\zeta_{PQ}^2}{\sigma_{PQ}^2} + \frac{2(1 + \lambda)^2 \delta_Q^2}{\sigma_{PQ}^2} \right) \\ &\leq \frac{1}{1 + \lambda} \left( \exp \left( \frac{2\lambda^2 \zeta_{PQ}^2}{\sigma_{PQ}^2} \right) \mathbb{E} \exp \left( 2(1 + \lambda)^2 \frac{\delta_P^2}{\sigma_{PQ}^2} \right) + \lambda \exp \left( \frac{2\zeta_{PQ}^2}{\sigma_{PQ}^2} \right) \mathbb{E} \exp \left( \frac{2(1 + \lambda)^2 \delta_Q^2}{\sigma_{PQ}^2} \right) \right). \end{aligned}$$

540 Since  $0 \leq \lambda \leq \sqrt{2\rho} + \lambda^*$ , so we have

$$\begin{aligned} & \mathbb{E} \exp(\delta^2/\hat{\sigma}^2) \\ &\leq \frac{1}{1 + \lambda} \exp \left( 2(2(\lambda^*)^2 + 4\rho^2) 4\hat{G}_\theta^2/\sigma_{PQ}^2 \right) \mathbb{E} \exp \left( (4 + 4(2(\lambda^*)^2 + 4\rho^2)) \delta_P^2/\sigma_{PQ}^2 \right) \\ & \quad + \frac{\lambda_t}{1 + \lambda_t} \exp \left( 4\hat{G}_\theta^2/\sigma_{PQ}^2 \right) \mathbb{E} \exp \left( (4 + 4(2(\lambda^*)^2 + 4\rho^2)) \delta_Q^2/\sigma_{PQ}^2 \right). \end{aligned}$$

541 Due to our choice  $\sigma_{PQ}^2 = 256(1 + (\lambda^*)^2 + \rho^2) \hat{G}_\theta^2$ , we have

$$\mathbb{E} \exp(\delta^2/\sigma_{PQ}^2) \leq \frac{1}{1 + \lambda} \exp(1/8) (\exp(1))^{1/8} + \frac{\lambda}{1 + \lambda} \exp(1/8) (\exp(1))^{1/8} \leq \exp(1).$$

542

□

543 Then, we establish the convergence of the penalized objective, under the dynamic of Algorithm 1.

544 **Lemma 11.** For Algorithm 1, the following statement holds true for any  $\lambda \geq 0$  with probability at  
 545 least  $1 - \tau$ :

$$\begin{aligned} & \left( \hat{R}_P(\bar{\theta}_T) - \hat{R}_P(\tilde{\theta}_{PQ}) \right) + \lambda (\hat{R}_Q(\bar{\theta}_T) - \hat{R}_Q(\hat{\theta}_Q) - 6\epsilon_Q) - \left( \frac{\gamma}{2} + \frac{1}{2\eta T} \right) \lambda^2 \\ &\leq \frac{\rho^2}{\eta T} + \eta \hat{G}_\lambda^2 + \eta \hat{G}_\theta^2 + \frac{\hat{G}_\lambda \sqrt{3 \log \frac{2}{\tau}}}{\sqrt{T}} (\lambda^* + 2\sqrt{2}\rho) + \frac{\sqrt{2}\rho \sigma_{PQ} \sqrt{3 \log \frac{2}{\tau}}}{\sqrt{T}} \\ & \quad + \frac{C_{PQ}(\log(T + 2\kappa_Q) + 2)^2 (\lambda^* + \sqrt{2}\rho)}{T} + \left( \frac{\hat{G}_\lambda \sqrt{3 \log \frac{2}{\tau}}}{\sqrt{T}} + \frac{C_{PQ}(\log(T + 2\kappa_Q) + 2)^2}{T} \right) \lambda, \end{aligned}$$

546 where  $C_{PQ} := (1 + 2\kappa_Q) M_x^2 M_y^2 + \frac{6\sigma_Q^2 \log(2/\tau)}{\lambda_{\min}^+(\hat{\Sigma}_Q)}$ ,  $\sigma_Q^2 = \left( M_x^2 \left( \frac{1 + \log(T + 2\kappa_Q)}{\lambda_{\min}^+(\hat{\Sigma}_Q)} M_x M_y \right) + M_x M_y \right)^2$ .

547 *Proof.* Define the constraint function  $g(\theta) := \hat{R}_Q(\theta) - \hat{R}_Q(\hat{\theta}_Q) - 6\epsilon_Q$  and  $L(\theta, \lambda) \doteq \hat{R}_P(\theta) +$   
 548  $\lambda g(\theta) - \frac{\gamma\lambda^2}{2}$ . We first show that  $\|\theta_t - \tilde{\theta}_{PQ}\|^2 + \|\lambda_t - \lambda^*\|^2 \leq 2\rho^2$ , for any  $t \in [T]$ . We prove this  
 549 by induction. Assume this holding for  $t$ , and for  $t+1$  we have

$$\begin{aligned}\|\theta_{t+1} - \tilde{\theta}_{PQ}\|^2 &= \|\theta_t - \eta g_\theta^t - \tilde{\theta}_{PQ}\|^2 \\ &= \|\theta_t - \tilde{\theta}_{PQ}\|^2 - 2\langle \eta g_\theta^t, \theta_t - \tilde{\theta}_{PQ} \rangle + \eta^2 \|g_\theta^t\|^2,\end{aligned}$$

550 where  $g_\theta^t = \begin{cases} (1 + \lambda_t)\nabla\ell(\theta_t; x_t, y_t), (x_t, y_t) \sim S_P, w.p. \frac{1}{1+\lambda_t} \\ (1 + \lambda_t)\nabla\ell(\theta_t; x_t, y_t), (x_t, y_t) \sim S_Q, w.p. \frac{\lambda_t}{1+\lambda_t} \end{cases}$ .

551 Then for  $t+1$ , we have:

$$\begin{aligned}\|\theta_{t+1} - \tilde{\theta}_{PQ}\|^2 &\leq \|\theta_t - \tilde{\theta}_{PQ}\|^2 - 2\eta_t \langle \nabla \hat{R}_P(\theta_t) + \lambda_t \nabla \hat{R}_Q(\theta_t), \theta_t - \tilde{\theta}_{PQ} \rangle \\ &\quad + 2\sqrt{2}\eta\delta_t\rho + \eta_t^2(1 + \lambda_t)^2\hat{G}_\theta^2 \\ &\leq \|\theta_t - \tilde{\theta}_{PQ}\|^2 - 2\eta \left( L(\theta_t, \lambda_t) - L(\tilde{\theta}_{PQ}, \lambda_t) \right) + 2\sqrt{2}\eta\delta_t\rho + \eta^2(1 + \lambda_t)^2\hat{G}_\theta^2\end{aligned}$$

where  $\delta_t = \|\nabla \hat{R}_P(\theta_t) + \lambda_t \nabla \hat{R}_Q(\theta_t) - g_\theta^t\|$ , and at last step we use the convexity of  $L(\cdot, \lambda_t)$ .  
 According to Lemma 10 we know that

$$\mathbb{E}[g_\theta^t] = \nabla \hat{R}_P(\theta_t) + \lambda_t \nabla \hat{R}_Q(\theta_t), \mathbb{E}[\exp(\delta_t^2/\sigma_{PQ}^2)] \leq \exp(1)$$

552 . Similarly, we have:

$$\begin{aligned}|\lambda_{t+1} - \lambda^*|^2 &= |\lambda_t - \lambda^*|^2 + 2\eta \langle g_\lambda^t, \lambda_t - \lambda^* \rangle + \eta^2 |g_\lambda^t - \gamma\lambda_t|^2 \\ &\leq |\lambda_t - \lambda^*|^2 + 2\eta \langle \hat{R}_Q(\theta_t) - \hat{R}_Q(\hat{\theta}_Q) - \epsilon_Q - \gamma\lambda_t, \lambda_t - \lambda^* \rangle \\ &\quad + 2\sqrt{2}\eta r_t\rho + 2\sqrt{2}\eta h_t\rho + 2\eta^2\hat{G}_\lambda^2 \\ &\leq (1 - \gamma\eta)|\lambda_t - \lambda^*|^2 - 2\eta (L(\theta_t, \lambda^*) - L(\theta_t, \lambda_t)) \\ &\quad + 2\sqrt{2}\eta r_t\rho + 2\sqrt{2}\eta h_t\rho + 2\eta^2\hat{G}_\lambda^2,\end{aligned}$$

where

$$g_\lambda^t = \ell(\theta_t; x_t, y_t) - \ell(\theta_{Q,t}; x_t, y_t) - 6\epsilon_Q$$

and

$$r_t = \|\ell(\theta_t; x_t, y_t) - \ell(\theta_{Q,t}; x_t, y_t) - (\hat{R}_Q(\theta_t) - \hat{R}_Q(\theta_{Q,t}))\|, h_t = |\hat{R}_Q(\theta_{Q,t}) - \hat{R}_Q(\hat{\theta}_Q)|$$

and at last step we use the  $\gamma$  concavity of  $L(\theta_t, \cdot)$ . It is easy to see that

$$\mathbb{E}[g_\lambda^t] = \hat{R}_Q(\theta_t) - \hat{R}_Q(\hat{\theta}_Q) - \epsilon_Q, \mathbb{E}[\exp(r_t^2/\hat{G}_\lambda^2)] \leq \exp(1).$$

553 Putting pieces together we have

$$\begin{aligned}\|\theta_{t+1} - \tilde{\theta}_{PQ}\|^2 + |\lambda_{t+1} - \lambda^*|^2 &\leq \left( |\lambda_t - \lambda^*|^2 + \|\theta_t - \tilde{\theta}_{PQ}\|^2 \right) - 2\eta \left( L(\theta_t, \lambda^*) - L(\tilde{\theta}_{PQ}, \lambda_t) \right) \\ &\quad + 2\sqrt{2}\eta\delta_t\rho + 2\sqrt{2}\eta r_t\rho + 2\sqrt{2}\eta h_t\rho + 2\eta^2\hat{G}_\lambda^2 + \eta^2(1 + \lambda_t)^2\hat{G}_\theta^2 \\ &\leq \left( |\lambda_t - \lambda^*|^2 + \|\theta_t - \tilde{\theta}_{PQ}\|^2 \right) - \underbrace{2\eta \left( L(\theta_t, \lambda^*) - L(\tilde{\theta}_{PQ}, \lambda_t) \right)}_{\geq -\frac{\gamma(\lambda^*)^2}{2}} \\ &\quad + 2\eta^2\hat{G}_\lambda^2 + \eta^2(1 + \sqrt{2}\rho + \lambda^*)^2\hat{G}_\theta^2 + 2\sqrt{2}\eta\rho(\delta_t + r_t + h_t)\end{aligned}$$

554 where the last step is due to

$$L(\theta_t, \lambda^*) - L(\tilde{\theta}_{PQ}, \lambda_t) = \underbrace{\hat{R}_P(\theta_t) + \lambda^*g(\theta_t) - \left( \hat{R}_P(\tilde{\theta}_{PQ}) + \lambda_tg(\tilde{\theta}_{PQ}) \right)}_{\geq 0} - \frac{\gamma(\lambda^*)^2}{2} + \frac{\gamma\lambda_t^2}{2}.$$

555 Performing telescoping sum yields:

$$\begin{aligned} \left\| \theta_{t+1} - \tilde{\theta}_{PQ} \right\|^2 + |\lambda_{t+1} - \lambda^*|^2 &\leq \left( \left\| \theta_0 - \tilde{\theta}_{PQ} \right\|^2 + |\lambda_0 - \lambda^*|^2 \right) + 2\eta^2 \hat{G}_\lambda^2 + \eta^2 (1 + \sqrt{2}\rho + \lambda^*)^2 \hat{G}_\theta^2 \\ &\quad + 2\sqrt{2}\eta\rho \sum_{s=0}^t \delta_s + 2\sqrt{2}\eta\rho \sum_{s=0}^t r_s + 2\sqrt{2}\eta\rho \sum_{s=0}^t h_s + T\gamma\eta(\lambda^*)^2. \end{aligned}$$

556 Due to Lemma 4 of [28], we know with probability  $1 - \tau/2$ ,

$$\sum_{t=0}^{T-1} \delta_t \leq \sqrt{T\sigma_{PQ}^2} \sqrt{3 \log \frac{2}{\tau}}, \quad \sum_{t=0}^{T-1} r_t \leq \sqrt{T\hat{G}_\lambda^2} \sqrt{3 \log \frac{2}{\tau}}, \quad (9)$$

557 and also according to Lemma 9,  $h_t \leq \frac{\lambda_{\min}^+(\hat{\Sigma}_Q)(1+2\kappa_Q)\|\hat{\theta}_Q\|^2}{t+2\kappa_Q} + \frac{6\sigma_Q^2 \log(2/\tau)(\log t+1)}{\lambda_{\min}^+(\hat{\Sigma}_Q)(t+2\kappa_Q)}$  for  $\sigma_Q^2 =$   
 558  $\left( M_x^2 \left( \frac{1+\log(T+2\kappa_Q)}{\lambda_{\min}^+(\hat{\Sigma}_Q)} M_x M_y \right) + M_x M_y \right)^2$ , which yields:

$$\begin{aligned} \sum_{s=0}^t h_s &= \sum_{s=0}^t \left( \frac{\lambda_{\min}^+(\hat{\Sigma}_Q)(1+2\kappa_Q)\|\hat{\theta}_Q\|^2}{s+2\kappa_Q} + \frac{6\sigma_Q^2 \log(2/\tau)(\log s+1)}{\lambda_{\min}^+(\hat{\Sigma}_Q)(s+2\kappa_Q)} \right) \\ &\leq \left( \lambda_{\min}^+(\hat{\Sigma}_Q)(1+2\kappa_Q)\|\hat{\theta}_Q\|^2 + \frac{6\sigma_Q^2 \log(2/\tau)(\log t+1)}{\lambda_{\min}^+(\hat{\Sigma}_Q)} \right) (\log(t+2\kappa_Q) + 2) \\ &\leq C_{PQ} \cdot (\log(t+2\kappa_Q) + 2)^2, \end{aligned} \quad (10)$$

559 where  $C_{PQ} := (1+2\kappa_Q)M_x^2 M_y^2 + \frac{6\sigma_Q^2 \log(2/\tau)}{\lambda_{\min}^+(\hat{\Sigma}_Q)}$ , and in the first inequality we use the fact  $\sum_{s=1}^t \frac{1}{s} \leq$   
 560  $1 + \int_1^t \frac{1}{s} \leq 1 + \log t$ . Putting pieces together yields:

$$\begin{aligned} \left\| \theta_{t+1} - \tilde{\theta}_{PQ} \right\|^2 + |\lambda_{t+1} - \lambda^*|^2 &\leq |\lambda_0 - \lambda^*|^2 + \left\| \theta_0 - \tilde{\theta}_{PQ} \right\|^2 + 2\eta^2 \hat{G}_\lambda^2 + \eta^2 (1 + \sqrt{2}\rho + \lambda^*)^2 \hat{G}_\theta^2 \\ &\quad + 4\sqrt{2}\eta\rho\sqrt{T}\sigma_Q \sqrt{3 \log \frac{2}{\tau}} + 2\sqrt{2}\eta\rho C_{PQ} (\log(t+2\kappa_Q) + 2)^2 + T\gamma\eta(\lambda^*)^2. \end{aligned} \quad (11)$$

561 Since we choose  $\eta = \frac{c_\eta}{\sqrt{T}}$  and  $\gamma = \hat{G}_\theta^2 \eta$ , where

$$c_\eta \leq \min \left\{ \frac{\rho}{2\sqrt{2}\hat{G}_\lambda}, \frac{\rho}{2(1+\sqrt{2}\rho+\lambda^*)\hat{G}_\theta}, \frac{\rho}{16\sqrt{6}\sigma_{PQ}\sqrt{\log \frac{2}{\tau}}}, \frac{\rho}{4C_{PQ}} \right\},$$

562 we conclude that  $\left\| \theta_{t+1} - \tilde{\theta}_{PQ} \right\|^2 + |\lambda_{t+1} - \lambda^*|^2 \leq 2\rho^2$ .

563 Now by similar analysis we have that for any  $\lambda \geq 0$

$$\begin{aligned} \left\| \theta_{t+1} - \tilde{\theta}_{PQ} \right\|^2 + |\lambda_{t+1} - \lambda|^2 &\leq \left\| \theta_t - \tilde{\theta}_{PQ} \right\|^2 + |\lambda_t - \lambda|^2 - 2\eta(L(\theta_t, \lambda) - L(\tilde{\theta}_{PQ}, \lambda_t)) \\ &\quad + 2\eta^2 \hat{G}_\lambda^2 + \eta^2 (1 + \lambda_t)^2 \hat{G}_\theta^2 \\ &\quad + 2\eta \langle \ell(\theta_t; x_t, y_t) - \ell(\theta_{Q,t}; x_t, y_t) - (\ell(\theta_t) - \ell(\theta_{Q,t})), \lambda_t - \lambda \rangle \\ &\quad + 2\eta \langle \ell(\hat{\theta}_Q) - \ell(\theta_{Q,t}), \lambda_t - \lambda \rangle + 2\eta r_t \left\| \theta_t - \tilde{\theta}_{PQ} \right\| \\ &\leq \left\| \theta_t - \tilde{\theta}_{PQ} \right\|^2 + |\lambda_t - \lambda|^2 - 2\eta(L(\theta_t, \lambda) - L(\tilde{\theta}_{PQ}, \lambda_t)) \\ &\quad + 2\eta^2 \hat{G}_\lambda^2 + \eta^2 (1 + \lambda_t)^2 \hat{G}_\theta^2 \\ &\quad + 2\eta r_t (\lambda_t + \lambda) + 2\eta h_t (\lambda_t + \lambda) + 2\sqrt{2}\eta\delta_t \rho. \end{aligned}$$

564 Since  $|\lambda_t - \lambda^*| \leq \sqrt{2}\rho$  we know  $\lambda_t \leq \lambda^* + \sqrt{2}\rho$ . Hence we have

$$\begin{aligned} \left\| \theta_{t+1} - \tilde{\theta}_{PQ} \right\|^2 + |\lambda_{t+1} - \lambda|^2 &\leq |\lambda_t - \lambda|^2 + \left\| \theta_t - \tilde{\theta}_{PQ} \right\|^2 - 2\eta(L(\theta_t, \lambda) - L(\tilde{\theta}_{PQ}, \lambda_t)) \\ &\quad + 2\eta^2 \hat{G}_\lambda^2 + \eta^2(1 + \lambda_t)^2 \hat{G}_\theta^2 + 2\eta r_t (\lambda^* + \sqrt{2}\rho) + 2\eta h_t (\lambda^* + \sqrt{2}\rho) \\ &\quad + 2\eta r_t \lambda + 2\eta h_t \lambda + 2\sqrt{2}\eta \delta_t \rho. \end{aligned}$$

565 Performing telescoping sum yields:

$$\begin{aligned} \frac{1}{T} \sum_{t=0}^{T-1} L(\theta_t, \lambda) - L(\tilde{\theta}_{PQ}, \lambda_t) &\leq \frac{1}{2\eta T} (|\lambda_0 - \lambda|^2 + \left\| \theta_0 - \tilde{\theta}_{PQ} \right\|^2) + \frac{1}{T} \eta \hat{G}_\lambda^2 + \frac{1}{2T} \eta \sum_{t=0}^{T-1} (1 + \lambda_t)^2 \hat{G}_\theta^2 \\ &\quad + \frac{1}{T} \sum_{t=0}^{T-1} r_t (\lambda^* + \sqrt{2}\rho) + \frac{1}{T} \sum_{t=0}^{T-1} h_t (\lambda^* + \sqrt{2}\rho) + \frac{1}{T} \sum_{t=0}^{T-1} r_t \lambda \\ &\quad + \frac{1}{T} \sum_{t=0}^{T-1} h_t \lambda + \sqrt{2}\rho \frac{1}{T} \sum_{t=0}^{T-1} \delta_t. \end{aligned}$$

566 By the definition of Lagrangian, we have

$$\begin{aligned} \frac{1}{T} \sum_{t=0}^{T-1} (\hat{R}_P(\theta_t) + \lambda g(\theta_t) - \frac{\gamma}{2} \lambda^2 - \hat{R}_P(\tilde{\theta}_{PQ}) - \underbrace{\lambda_t g(\tilde{\theta}_{PQ})}_{\leq 0} + \frac{\gamma}{2} \lambda_t^2) \\ \leq \frac{1}{2\eta T} (|\lambda_0 - \lambda|^2 + \left\| \theta_0 - \tilde{\theta}_{PQ} \right\|^2) + \frac{1}{T} \eta \hat{G}_\lambda^2 + \frac{1}{2T} \eta \sum_{t=0}^{T-1} (1 + \lambda_t)^2 \hat{G}_\theta^2 \\ + \frac{1}{T} \sum_{t=0}^{T-1} r_t (\lambda^* + \sqrt{2}\rho) + \frac{1}{T} \sum_{t=0}^{T-1} h_t (\lambda^* + \sqrt{2}\rho) + \frac{1}{T} \sum_{t=0}^{T-1} r_t \lambda + \frac{1}{T} \sum_{t=0}^{T-1} h_t \lambda + \sqrt{2}\rho \frac{1}{T} \sum_{t=0}^{T-1} \delta_t. \end{aligned}$$

567 Evoking the bound from (9) and (10) yields:

$$\begin{aligned} \frac{1}{T} \sum_{t=0}^{T-1} (\hat{R}_P(\theta_t) + \lambda g(\theta_t) - \frac{\gamma}{2} \lambda^2 - \hat{R}_P(\tilde{\theta}_{PQ}) + \frac{\gamma}{2} \lambda_t^2) \\ \leq \frac{1}{2\eta T} (|\lambda_0 - \lambda|^2 + \left\| \theta_0 - \tilde{\theta}_{PQ} \right\|^2) + \frac{1}{T} \eta \hat{G}_\lambda^2 + \frac{1}{2T} \eta \sum_{t=0}^{T-1} (1 + \lambda_t)^2 \hat{G}_\theta^2 \\ + \frac{1}{T} \sqrt{T \hat{G}_\lambda^2} \sqrt{3 \log \frac{2}{\tau}} (\lambda^* + 2\sqrt{2}\rho) + \frac{1}{T} C_{PQ} \cdot (\log(T + 2\kappa_Q) + 2)^2 (\lambda^* + \sqrt{2}\rho) \\ + \frac{1}{T} \sqrt{T \hat{G}_\lambda^2} \sqrt{3 \log \frac{2}{\tau}} \lambda + \frac{1}{T} C_{PQ} \cdot (\log(T + 2\kappa_Q) + 2)^2 \lambda + \frac{\sqrt{2}\rho \sigma_{PQ} \sqrt{3 \log \frac{2}{\tau}}}{\sqrt{T}}. \end{aligned}$$

568 Plugging in  $\lambda_0 = 0, \theta_0 = \mathbf{0}$  and re-arranging the terms yields:

$$\begin{aligned} \frac{1}{T} \sum_{t=0}^{T-1} (\hat{R}_P(\theta_t) - \hat{R}_P(\tilde{\theta}_{PQ})) + \frac{1}{T} \sum_{t=0}^{T-1} \lambda g(\theta_t) - \left( \frac{\gamma}{2} + \frac{1}{2\eta T} \right) \lambda^2 \\ \leq \frac{\rho^2}{\eta T} + \eta \hat{G}_\lambda^2 + \frac{1}{2T} \sum_{t=0}^{T-1} (\eta(1 + \lambda_t)^2 \hat{G}_\theta^2 - \gamma \lambda_t^2) + \frac{\sqrt{2}\rho \sigma_{PQ} \sqrt{3 \log \frac{2}{\tau}}}{\sqrt{T}} \\ + \frac{\hat{G}_\lambda \sqrt{3 \log \frac{2}{\tau}}}{\sqrt{T}} (\lambda^* + 2\sqrt{2}\rho) + \frac{1}{T} C_{PQ} (\log(T + 2\kappa_Q) + 2)^2 (\lambda^* + 2\sqrt{2}\rho) \\ + \left( \frac{\hat{G}_\lambda \sqrt{3 \log \frac{2}{\tau}}}{\sqrt{T}} + \frac{C_{PQ} (\log(T + 2\kappa_Q) + 2)^2}{T} \right) \lambda. \end{aligned}$$

569 By our choice,  $\gamma = \hat{G}_\theta^2 \eta$ , so we have

$$\begin{aligned} & \frac{1}{T} \sum_{t=0}^{T-1} \left( \hat{R}_P(\theta_t) - \hat{R}_P(\tilde{\theta}_{PQ}) \right) + \frac{1}{T} \sum_{t=0}^{T-1} \lambda g(\theta_t) - \left( \frac{\gamma}{2} + \frac{1}{2\eta T} \right) \lambda^2 \\ & \leq \frac{\rho^2}{\eta T} + \eta \hat{G}_\lambda^2 + \eta \hat{G}_\theta^2 + \frac{\hat{G}_\lambda \sqrt{3 \log \frac{2}{\tau}}}{\sqrt{T}} (\lambda^* + \sqrt{2}\rho) + \frac{\sqrt{2}\rho\sigma_{PQ} \sqrt{3 \log \frac{2}{\tau}}}{\sqrt{T}} \\ & + \frac{1}{T} C_{PQ} (\log(T + 2\kappa_Q) + 2)^2 (\lambda^* + \sqrt{2}\rho) + \left( \frac{\hat{G}_\lambda \sqrt{3 \log \frac{2}{\tau}}}{\sqrt{T}} + \frac{C_{PQ} (\log(T + 2\kappa_Q) + 2)^2}{T} \right) \lambda. \end{aligned}$$

570 Define  $\hat{\theta}_T = \frac{1}{T} \sum_{t=0}^{T-1} \theta_t$ , and then by Jensen's inequality we have

$$\begin{aligned} & \left( \hat{R}_P(\bar{\theta}_T) - \hat{R}_P(\tilde{\theta}_{PQ}) \right) + \lambda (\hat{R}_Q(\bar{\theta}_T) - \hat{R}_Q(\hat{\theta}_Q) - 6\epsilon_Q) - \left( \frac{\gamma}{2} + \frac{1}{2\eta T} \right) \lambda^2 \\ & \leq \frac{\rho^2}{\eta T} + \eta \hat{G}_\lambda^2 + \eta \hat{G}_\theta^2 + \frac{\hat{G}_\lambda \sqrt{3 \log \frac{2}{\tau}}}{\sqrt{T}} (\lambda^* + \sqrt{2}\rho) + \frac{\sqrt{2}\rho\sigma_{PQ} \sqrt{3 \log \frac{2}{\tau}}}{\sqrt{T}} \\ & + \frac{1}{T} C_{PQ} (\log(T + 2\kappa_Q) + 2)^2 (\lambda^* + \sqrt{2}\rho) + \left( \frac{\hat{G}_\lambda \sqrt{3 \log \frac{2}{\tau}}}{\sqrt{T}} + \frac{C_{PQ} (\log(T + 2\kappa_Q) + 2)^2}{T} \right) \lambda. \end{aligned}$$

571

□

## 572 12.2 Proof of Theorem 2

573 *Proof.* Note that Lemma 11 holds for any  $\lambda \geq 0$ . Now let's discuss by cases. If  $\bar{\theta}_T$  is in the constraint  
574 set, then  $\hat{\theta}_{PQ} = \bar{\theta}_T$  and we simply set  $\lambda = 0$  and get the convergence:

$$\begin{aligned} & \hat{R}_P(\hat{\theta}_{PQ}) - \hat{R}_P(\tilde{\theta}_{PQ}) \\ & \leq \frac{\rho^2}{\eta T} + \eta \hat{G}_\lambda^2 + \eta \hat{G}_\theta^2 + \frac{\hat{G}_\lambda \sqrt{3 \log \frac{2}{\tau}}}{\sqrt{T}} (\lambda^* + 2\sqrt{2}\rho) + \frac{\sqrt{2}\rho\sigma_{PQ} \sqrt{3 \log \frac{2}{\tau}}}{\sqrt{T}} \\ & + \frac{1}{T} C_{PQ} \cdot (\log(T + 2\kappa_Q) + 2)^2 (\lambda^* + \sqrt{2}\rho). \end{aligned}$$

575 If  $\bar{\theta}_T$  is not in the constraint set, we set  $\lambda = \frac{\hat{R}_Q(\bar{\theta}_T) - \hat{R}_Q(\hat{\theta}_Q) - 6\epsilon_Q}{\gamma + \frac{1}{\eta T}}$ , and define  $g(\theta) := \hat{R}_Q(\theta) -$

576  $\hat{R}_Q(\hat{\theta}_Q) - 6\epsilon_Q$  for notational simplicity, which yields:

$$\begin{aligned} & (\hat{R}_P(\bar{\theta}_T) - \hat{R}_P(\tilde{\theta}_{PQ})) + \frac{(g(\bar{\theta}_T))^2}{2(\gamma + \frac{1}{\eta T})} \\ & \leq \frac{\rho^2}{\eta T} + \eta \hat{G}_\lambda^2 + \eta \hat{G}_\theta^2 + \frac{\hat{G}_\lambda \sqrt{3 \log \frac{2}{\tau}}}{\sqrt{T}} (\lambda^* + 2\sqrt{2}\rho) + \frac{\sqrt{2}\rho\sigma_{PQ} \sqrt{3 \log \frac{2}{\tau}}}{\sqrt{T}} \\ & + \frac{1}{T} C_{PQ} \cdot (\log(T + 2\kappa_Q) + 2)^2 (\lambda^* + \sqrt{2}\rho) \\ & + \left( \frac{\hat{G}_\lambda \sqrt{3 \log \frac{2}{\tau}}}{\sqrt{T}} + \frac{C_{PQ} \cdot (\log(T + 2\kappa_Q) + 2)^2}{T} \right) \left| \frac{g(\bar{\theta}_T)}{\gamma + \frac{1}{\eta T}} \right|. \end{aligned} \quad (12)$$

577 Since  $\bar{\theta}_T$  is not in the constraint set and  $\hat{\theta}_{PQ}$  is the projection of it onto inexact constraint set  
578  $\tilde{g}(\theta) := \hat{R}_Q(\theta) - \hat{R}_Q(\theta_{Q,T}) - 3\epsilon_Q \leq 0$ , by KKT condition we know  $\tilde{g}(\hat{\theta}_{PQ}) = 0$  and  $\bar{\theta}_T - \hat{\theta}_{PQ} =$   
579  $s \cdot \nabla \tilde{g}(\hat{\theta}_{PQ})$  for some  $s > 0$ . Defining  $\Delta := 3\epsilon_Q - (\hat{R}_Q(\theta_{Q,T}) - \hat{R}_Q(\hat{\theta}_Q))$ , and due to our choice



580 of  $T$  we know  $\Delta \geq 0$ . Then we have

$$\begin{aligned}
g(\bar{\theta}_T) &= g(\bar{\theta}_T) - \tilde{g}(\hat{\theta}_{PQ}) \\
&= \tilde{g}(\bar{\theta}_T) - \tilde{g}(\hat{\theta}_{PQ}) - (\tilde{g}(\bar{\theta}_T) - g(\bar{\theta}_T)) \\
&= \tilde{g}(\bar{\theta}_T) - \tilde{g}(\hat{\theta}_{PQ}) - (\hat{R}_Q(\hat{\theta}_Q) - \hat{R}_Q(\theta_{Q,T}) + 3\epsilon_Q) \\
&\geq \langle \nabla \tilde{g}(\hat{\theta}_{PQ}), \bar{\theta}_T - \hat{\theta}_{PQ} \rangle - \Delta = \left\| \nabla \tilde{g}(\hat{\theta}_{PQ}) \right\| \left\| \bar{\theta}_T - \hat{\theta}_{PQ} \right\| - \Delta
\end{aligned}$$

581 where the inequality is due to convexity of  $g(\cdot)$ . Evoking Lemma 8 with  $\epsilon = 3\epsilon_Q + \hat{R}_Q(\theta_{Q,T}) -$   
582  $\hat{R}_Q(\hat{\theta}_Q)$  gives that  $\min_{\tilde{g}(\theta)=0} \left\| \nabla \tilde{g}(\hat{\theta}_{PQ}) \right\| \geq \sqrt{\lambda_{\min}^+(\hat{\Sigma}_Q)(3\epsilon_Q + \hat{R}_Q(\theta_{Q,T}) - \hat{R}_Q(\hat{\theta}_Q))} \geq$   
583  $\sqrt{\lambda_{\min}^+(\hat{\Sigma}_Q)3\epsilon_Q}$ , so  $g(\bar{\theta}_T) \geq \sqrt{\lambda_{\min}^+(\hat{\Sigma}_Q)3\epsilon_Q} \left\| \bar{\theta}_T - \hat{\theta}_{PQ} \right\| - \Delta$ .

584 On the other hand, since  $\hat{\theta}_{PQ}$  is the projection of  $\bar{\theta}_T$  onto constraint set, and  $\tilde{\theta}_{PQ}$  is in the constraint  
585 set, we know

$$\left\| \hat{\theta}_{PQ} - \tilde{\theta}_{PQ} \right\|^2 \leq \left\| \bar{\theta}_T - \tilde{\theta}_{PQ} \right\|^2 \leq 2\rho^2.$$

586 Hence  $\hat{\theta}_{PQ}$  also falls in the set  $\left\{ \theta : \left\| \theta - \tilde{\theta}_{PQ} \right\|^2 \leq 2\rho^2 \right\}$ , so the gradient upper bound  $\hat{G}_\theta$  applies  
587 to  $\hat{\theta}_{PQ}$ . Hence we also know

$$\begin{aligned}
g(\bar{\theta}_T) &= g(\bar{\theta}_T) - \tilde{g}(\hat{\theta}_{PQ}) \\
&= \hat{R}_Q(\bar{\theta}_T) - \hat{R}_Q(\hat{\theta}_Q) - 6\epsilon_Q - (\hat{R}_Q(\hat{\theta}_{PQ}) - \hat{R}_Q(\theta_{Q,T}) - 3\epsilon_Q) \\
&\leq \hat{G}_\theta \left\| \bar{\theta}_T - \hat{\theta}_{PQ} \right\| + \underbrace{\hat{R}_Q(\theta_{Q,T}) - \hat{R}_Q(\hat{\theta}_Q) - 3\epsilon_Q}_{\leq 0}.
\end{aligned}$$

588 Plugging the upper and lower bound of  $g(\bar{\theta}_T)$  into (12) yields:

$$\begin{aligned}
&(\hat{R}_P(\bar{\theta}_T) - \hat{R}_P(\tilde{\theta}_{PQ})) + \sqrt{T} \frac{\lambda_{\min}^+(\hat{\Sigma}_Q)3\epsilon_Q \left( \left\| \bar{\theta}_T - \hat{\theta}_{PQ} \right\| - \Delta \right)^2}{4(c_\eta \hat{G}_\theta^2 + \frac{1}{c_\eta})} \\
&\leq \frac{\rho^2}{\eta T} + \eta \hat{G}_\lambda^2 + \eta \hat{G}_\theta^2 + \frac{\hat{G}_\lambda \sqrt{3 \log \frac{2}{\tau}}}{\sqrt{T}} \left( \lambda^* + 2\sqrt{2}\rho \right) + \frac{\sqrt{2}\rho\sigma_{PQ} \sqrt{3 \log \frac{2}{\tau}}}{\sqrt{T}} \\
&\quad + \frac{1}{T} C_{PQ} \cdot (\log(T + 2\kappa_Q) + 2)^2 \left( \lambda^* + \sqrt{2}\rho \right) \\
&\quad + \left( \frac{\hat{G}_\lambda \sqrt{3 \log \frac{2}{\tau}}}{\sqrt{T}} + \frac{C_{PQ} \cdot (\log(T + 2\kappa_Q) + 2)^2}{T} \right) \frac{\sqrt{T}}{c_\eta \hat{G}_\theta^2 + \frac{1}{c_\eta}} \hat{G}_\theta \left\| \bar{\theta}_T - \hat{\theta}_{PQ} \right\|.
\end{aligned}$$

589 Notice the following decomposition:

$$\hat{R}_P(\bar{\theta}_T) - \hat{R}_P(\tilde{\theta}_{PQ}) \geq \hat{R}_P(\bar{\theta}_T) - \hat{R}_P(\hat{\theta}_{PQ}) \geq -\hat{G}_\theta \left\| \bar{\theta}_T - \hat{\theta}_{PQ} \right\|.$$

590 Also notice the fact  $(a - b)^2 \geq \frac{1}{2}a^2 - b^2$  holding for any  $a > 0, b > 0$ , we know

$$\left( \left\| \bar{\theta}_T - \hat{\theta}_{PQ} \right\| - \Delta \right)^2 \geq \frac{1}{2} \left\| \bar{\theta}_T - \hat{\theta}_{PQ} \right\|^2 - \Delta^2.$$

591 Putting pieces together yield the following inequality:

$$a \left\| \bar{\theta}_T - \hat{\theta}_{PQ} \right\|^2 - b \left\| \bar{\theta}_T - \hat{\theta}_{PQ} \right\| - c \leq 0,$$

where:

$$\begin{aligned} a &= \frac{3\sqrt{T}\lambda_{\min}^+(\hat{\Sigma}_Q)\epsilon_Q}{8(c_\eta\hat{G}_\theta^2 + \frac{1}{c_\eta})} \\ b &= \frac{\hat{G}_\theta}{(c_\eta\hat{G}_\theta^2 + \frac{1}{c_\eta})} \left( \hat{G}_\lambda \sqrt{3\log \frac{2}{\tau}} + \frac{C_{PQ} \cdot (\log(T + 2\kappa_Q) + 2)^2}{\sqrt{T}} \right) + \hat{G}_\theta, \\ c &= \frac{\frac{\rho^2}{c_\eta} + c_\eta(\hat{G}_\lambda^2 + \hat{G}_\theta^2) + \hat{G}_\lambda \sqrt{3\log \frac{2}{\tau}} (\lambda^* + 2\sqrt{2}\rho) + \sqrt{2}\rho\sigma_{PQ} \sqrt{3\log \frac{2}{\tau}}}{\sqrt{T}} \\ &\quad + \frac{C \cdot (\log(T + 2\kappa_Q) + 2)^2 (\lambda^* + \sqrt{2}\rho)}{T} + \sqrt{T} \frac{3\lambda_{\min}^+(\hat{\Sigma}_Q)\epsilon_Q \Delta^2}{4(c_\eta\hat{G}_\theta^2 + \frac{1}{c_\eta})}. \end{aligned}$$

592 Assume  $T \geq \left( \frac{C_{PQ} \cdot (\log(T + 2\kappa_Q) + 2)^2}{\hat{G}_\lambda \sqrt{3\log \frac{2}{\tau}}} \right)^2$ , so  $b \leq \frac{2\hat{G}_\theta \hat{G}_\lambda \sqrt{3\log \frac{2}{\tau}}}{(c_\eta\hat{G}_\theta^2 + \frac{1}{c_\eta})} + \hat{G}_\theta$ . Solving the above quadratic  
593 inequality yields:

$$\begin{aligned} \left\| \bar{\theta}_T - \hat{\theta}_{PQ} \right\| &\leq \frac{b + \sqrt{b^2 + 4ac}}{2a} \leq \frac{b}{a} + \sqrt{\frac{c}{a}} \\ &\leq \frac{8(c_\eta\hat{G}_\theta^2 + \frac{1}{c_\eta})\hat{G}_\theta + 16\hat{G}_\theta\hat{G}_\lambda\sqrt{3\log \frac{2}{\tau}}}{3\lambda_{\min}^+(\hat{\Sigma}_Q)\epsilon_Q\sqrt{T}} + \frac{1}{2}\Delta \\ &\quad + \sqrt{\frac{8(c_\eta\hat{G}_\theta^2 + \frac{1}{c_\eta})}{3\sqrt{T}\lambda_{\min}^+(\hat{\Sigma}_Q)\epsilon_Q} \sqrt{\frac{\frac{\rho^2}{c_\eta} + c_\eta(\hat{G}_\lambda^2 + \hat{G}_\theta^2) + \hat{G}_\lambda \sqrt{3\log \frac{2}{\tau}} (\lambda^* + 2\sqrt{2}\rho) + \sqrt{2}\rho\sigma_{PQ} \sqrt{3\log \frac{2}{\tau}}}{\sqrt{T}}}} \\ &\quad + \sqrt{\frac{8(c_\eta\hat{G}_\theta^2 + \frac{1}{c_\eta})}{3\sqrt{T}\lambda_{\min}^+(\hat{\Sigma}_Q)\epsilon_Q} \sqrt{\frac{C_{PQ} \cdot (\log(T + 2\kappa_Q) + 2)^2 (\lambda^* + \sqrt{2}\rho)}{T}}} \\ &= \frac{16(c_\eta\hat{G}_\theta^2 + \frac{1}{c_\eta})\hat{G}_\theta + 16\hat{G}_\theta\hat{G}_\lambda\sqrt{3\log \frac{2}{\tau}}}{\lambda_{\min}^+(\hat{\Sigma}_Q)\epsilon_Q\sqrt{T}} + \frac{1}{2}\Delta + \frac{C_{PQ} \cdot (\log(T + 2\kappa_Q) + 2)^2 (\lambda^* + \sqrt{2}\rho)}{2T} \\ &\quad + \frac{\frac{\rho^2}{c_\eta} + c_\eta(\hat{G}_\lambda^2 + \hat{G}_\theta^2) + \hat{G}_\lambda \sqrt{3\log \frac{2}{\tau}} (\lambda^* + 2\sqrt{2}\rho) + \sqrt{2}\rho\sigma_{PQ} \sqrt{3\log \frac{2}{\tau}}}{2\sqrt{T}} \end{aligned}$$

594 where at the last step we use the fact  $\sqrt{ab} \leq \frac{a^2+b^2}{2}$ . Finally, note the following decomposition:

$$\begin{aligned} \hat{R}_P(\hat{\theta}_{PQ}) - \hat{R}_P(\tilde{\theta}_{PQ}) &= \hat{R}_P(\hat{\theta}_{PQ}) - \hat{R}_P(\bar{\theta}_T) + \hat{R}_P(\bar{\theta}_T) - \hat{R}_P(\tilde{\theta}_{PQ}) \\ &\leq \hat{G}_\theta \left\| \bar{\theta}_T - \hat{\theta}_{PQ} \right\| + \hat{R}_P(\bar{\theta}_T) - \hat{R}_P(\tilde{\theta}_{PQ}) \\ &\leq \left( \hat{G}_\theta + \frac{2\hat{G}_\lambda \sqrt{3\log \frac{2}{\tau}}}{c_\eta\hat{G}_\theta^2 + \frac{1}{c_\eta}} \hat{G}_\theta \right) \left\| \bar{\theta}_T - \hat{\theta}_{PQ} \right\| \\ &\quad + \frac{\frac{\rho^2}{c_\eta} + c_\eta(\hat{G}_\lambda^2 + \hat{G}_\theta^2) + \hat{G}_\lambda \sqrt{3\log \frac{2}{\tau}} (\lambda^* + 2\sqrt{2}\rho) + \sqrt{2}\rho\sigma_{PQ} \sqrt{3\log \frac{2}{\tau}}}{\sqrt{T}} \\ &\quad + \frac{C_{PQ} \cdot (\log(T + 2\kappa_Q) + 2)^2 (\lambda^* + \sqrt{2}\rho)}{T}. \end{aligned}$$

595 Since we assume  $T \geq \left( \frac{C_{PQ} \cdot (\log(T+2\kappa_Q))^2}{\hat{G}_\lambda \sqrt{3 \log \frac{2}{\tau}}} \right)^2$ , we know

$$\begin{aligned} \hat{R}_P(\hat{\theta}_{PQ}) - \hat{R}_P(\tilde{\theta}_{PQ}) &\leq \hat{G}_\theta \left\| \bar{\theta}_T - \hat{\theta}_{PQ} \right\| + \hat{R}_P(\bar{\theta}_T) - \hat{R}_P(\tilde{\theta}_{PQ}) \\ &\leq \left( \hat{G}_\theta + \frac{2\hat{G}_\lambda \sqrt{3 \log \frac{2}{\tau}}}{c_\eta \hat{G}_\theta^2 + \frac{1}{c_\eta}} \hat{G}_\theta \right) \left\| \bar{\theta}_T - \hat{\theta}_{PQ} \right\| \\ &\quad + \frac{\frac{\rho^2}{c_\eta} + c_\eta(\hat{G}_\lambda^2 + \hat{G}_\theta^2) + 2\hat{G}_\lambda \sqrt{3 \log \frac{2}{\tau}} (\lambda^* + 2\sqrt{2}\rho) + \sqrt{2}\rho\sigma_{PQ} \sqrt{3 \log \frac{2}{\tau}}}{\sqrt{T}}. \end{aligned}$$

596 Plugging bound of  $\left\| \bar{\theta}_T - \hat{\theta}_{PQ} \right\|$  and Lemma 9 yields:

$$\begin{aligned} &\hat{R}_P(\hat{\theta}_{PQ}) - \hat{R}_P(\tilde{\theta}_{PQ}) \\ &\leq \left( \hat{G}_\theta + \frac{2\hat{G}_\lambda \sqrt{3 \log \frac{2}{\tau}}}{c_\eta \hat{G}_\theta^2 + \frac{1}{c_\eta}} \hat{G}_\theta \right) \left( \frac{16(c_\eta \hat{G}_\theta^2 + \frac{1}{c_\eta}) \hat{G}_\theta + 16\hat{G}_\theta \hat{G}_\lambda \sqrt{3 \log \frac{2}{\tau}}}{\lambda_{\min}^+(\hat{\Sigma}_Q) \epsilon_Q \sqrt{T}} + \frac{2C_{PQ} \log T}{(T + 2\kappa_Q)} \right) \\ &\quad + 48 \left( \hat{G}_\theta + \frac{\hat{G}_\lambda \sqrt{\log \frac{2}{\tau}}}{c_\eta \hat{G}_\theta^2 + \frac{1}{c_\eta}} \hat{G}_\theta \right) \left( \frac{\frac{\rho^2}{c_\eta} + c_\eta(\hat{G}_\lambda^2 + \hat{G}_\theta^2) + \hat{G}_\lambda \sqrt{\log \frac{2}{\tau}} (\lambda^* + \rho) + \rho\sigma_{PQ} \sqrt{\log \frac{2}{\tau}}}{\sqrt{T}} \right). \end{aligned}$$

597 Now we simplify the above bound. By the definition of  $c_\eta$  we know  $c_\eta \leq \frac{1}{\hat{G}_\theta}$ , so we have

$$\begin{aligned} &\hat{R}_P(\hat{\theta}_{PQ}) - \hat{R}_P(\tilde{\theta}_{PQ}) \\ &\leq \left( \hat{G}_\theta + \frac{2\hat{G}_\lambda \sqrt{3 \log \frac{2}{\tau}}}{c_\eta \hat{G}_\theta + 1} \right) \left( \frac{16(\hat{G}_\theta + \frac{1}{c_\eta}) \hat{G}_\theta + 16\hat{G}_\theta \hat{G}_\lambda \sqrt{3 \log \frac{2}{\tau}}}{\lambda_{\min}^+(\hat{\Sigma}_Q) \epsilon_Q \sqrt{T}} + \frac{2C_{PQ} \log T}{(T + 2\kappa_Q)} \right) \\ &\quad + 48 \left( \hat{G}_\theta + \frac{\hat{G}_\lambda \sqrt{\log \frac{2}{\tau}}}{c_\eta \hat{G}_\theta + 1} \right) \left( \frac{\frac{\rho^2}{c_\eta} + c_\eta(\hat{G}_\lambda^2 + \hat{G}_\theta^2) + \hat{G}_\lambda \sqrt{\log \frac{2}{\tau}} (\lambda^* + \rho) + \rho\sigma_{PQ} \sqrt{\log \frac{2}{\tau}}}{\sqrt{T}} \right) \\ &\leq \left( \hat{G}_\theta + 2\hat{G}_\lambda \sqrt{3 \log \frac{2}{\tau}} \right) \left( \frac{16(\hat{G}_\theta + \frac{1}{c_\eta}) \hat{G}_\theta + 16\hat{G}_\theta \hat{G}_\lambda \sqrt{3 \log \frac{2}{\tau}}}{\lambda_{\min}^+(\hat{\Sigma}_Q) \epsilon_Q \sqrt{T}} + \frac{2C_{PQ} \log T}{(T + 2\kappa_Q)} \right) \\ &\quad + 48 \left( \hat{G}_\theta + \hat{G}_\lambda \sqrt{\log \frac{2}{\tau}} \right) \left( \frac{\frac{\rho^2}{c_\eta} + c_\eta(\hat{G}_\lambda^2 + \hat{G}_\theta^2) + ((\lambda^* + \rho) \hat{G}_\lambda + \rho\sigma_{PQ}) \sqrt{\log \frac{2}{\tau}}}{\sqrt{T}} \right). \end{aligned}$$

598 Again recall we choose:  $T \geq \left( \frac{C_{PQ} \cdot (\log(T+2\kappa_Q))^2}{\hat{G}_\lambda \sqrt{\log 1/\tau}} \right)^2$ , so  $\frac{2C_{PQ} \log T}{(T+2\kappa_Q)} \leq \frac{\hat{G}_\lambda \sqrt{\log 1/\tau}}{\sqrt{T}}$ . So we have

$$\begin{aligned} &\hat{R}_P(\hat{\theta}_{PQ}) - \hat{R}_P(\tilde{\theta}_{PQ}) \\ &\leq \left( \hat{G}_\theta + 2\hat{G}_\lambda \sqrt{3 \log \frac{2}{\tau}} \right) \left( \frac{32\frac{\hat{G}_\theta}{c_\eta} + 16\hat{G}_\theta \hat{G}_\lambda \sqrt{3 \log \frac{2}{\tau}}}{\lambda_{\min}^+(\hat{\Sigma}_Q) \epsilon_Q \sqrt{T}} + \frac{\hat{G}_\lambda \sqrt{\log \frac{1}{\tau}}}{\sqrt{T}} \right) \\ &\quad + 2 \left( \hat{G}_\theta + 2\hat{G}_\lambda \sqrt{3 \log \frac{2}{\tau}} \right) \left( \frac{\frac{\rho^2}{c_\eta} + c_\eta(\hat{G}_\lambda^2 + \hat{G}_\theta^2) + \sqrt{2}\rho\sigma_{PQ} \sqrt{3 \log \frac{2}{\tau}}}{\sqrt{T}} \right) \\ &\lesssim \left( \hat{G}_\theta + \hat{G}_\lambda \sqrt{\log \frac{1}{\tau}} \right) \left( \frac{\frac{\hat{G}_\theta}{c_\eta} + \hat{G}_\theta \hat{G}_\lambda \sqrt{\log \frac{1}{\tau}}}{\lambda_{\min}^+(\hat{\Sigma}_Q) \epsilon_Q \sqrt{T}} + \frac{((\lambda^* + \rho) \hat{G}_\lambda + \rho\sigma_{PQ}) \sqrt{\log \frac{1}{\tau}} + \frac{\rho^2}{c_\eta} + c_\eta \hat{G}_\lambda^2}{\sqrt{T}} \right). \end{aligned}$$

Finally, by definition of  $c_\eta$  we know  $\frac{\rho^2}{c_\eta} \geq c_\eta \hat{G}_\lambda^2$ ,  $\frac{\rho^2}{c_\eta} \geq \rho \hat{G}_\lambda$  and  $\frac{\rho^2}{c_\eta} \geq \rho 16\sqrt{6}\sigma_{PQ}\sqrt{\log \frac{2}{\tau}}$  which concludes the proof:

$$\hat{R}_P(\hat{\theta}_{PQ}) - \hat{R}_P(\tilde{\theta}_{PQ}) \lesssim \left( \hat{G}_\theta + \hat{G}_\lambda \sqrt{\log \frac{1}{\tau}} \right) \left( \frac{\hat{G}_\theta}{\lambda_{\min}^+(\hat{\Sigma}_Q) \epsilon_Q \sqrt{T}} + \frac{\lambda^* \hat{G}_\lambda \sqrt{\log \frac{1}{\tau} + \frac{\rho^2}{c_\eta}}}{\sqrt{T}} \right).$$

□

### 13 Proof of the Results of General Loss

In this section we provide the missing proofs in Section 8. We first introduce the following lemma which establishes the convergence of auxiliary iterates  $\theta_{Q,t}$  to  $Q$  ERM model.

**Lemma 12** (High probability convergence of  $\theta_{Q,t}$ ). *If we choose  $\alpha_t = \frac{1}{m_1} \cdot \frac{1}{t+2\kappa}$ , then with probability at least  $1 - \tau$ , for any  $t \geq 0$  we have:*

$$\hat{R}_Q(\theta_{Q,t}) - \hat{R}_Q(\hat{\theta}_Q) \leq \frac{m_1(1+2\kappa_Q)(\frac{2}{m_1^2}\|\nabla \hat{R}_Q(\theta_{Q,0})\|^2 + 2\|\theta_{Q,0}\|^2)}{t+2\kappa} + \frac{6\hat{G}_\theta^2 \log(2/\tau)(\log t + 1)}{m_1(t+2\kappa)}.$$

*Proof.* We first examine the boundedness of  $\|\theta_{Q,t}\|$ . Define  $e_t \doteq \nabla \ell(\theta_{Q,t}; x_t, y_t) - \nabla \ell(\theta_{Q,0}; x_t, y_t)$ . According to updating rule of  $\theta_{Q,t}$  we have

$$\begin{aligned} \|\theta_{Q,t+1} - \theta_{Q,0}\| &\leq \|\theta_{Q,t} - \alpha_t \nabla \ell(\theta_{Q,t}; x_t, y_t) - (\theta_{Q,0} - \alpha_t \nabla \ell(\theta_{Q,0}; x_t, y_t))\| \\ &\quad + \alpha_t \|\nabla \ell(\theta_{Q,0}; x_t, y_t)\| \\ &= \sqrt{\|\theta_{Q,t} - \theta_{Q,0}\|^2 - 2\alpha_t \langle e_t, \theta_{Q,t} - \theta_{Q,0} \rangle + \alpha_t^2 \|e_t\|^2} \\ &\quad + \alpha_t \|\nabla \ell(\theta_{Q,0}; x_t, y_t)\| \\ &\leq \|\theta_{Q,t} - \theta_{Q,0}\| + \alpha_t \|\nabla \ell(\theta_{Q,0}; x_t, y_t)\| \\ &\leq \sum_{j=0}^t \alpha_j^2 \|\nabla \ell(\theta_{Q,0}; x_j, y_j)\|^2 \\ &\leq \sum_{j=0}^t \frac{1}{m_1} \cdot \frac{1}{t+2\kappa} \sup_{(x,y) \in S_Q} \|\nabla \ell(\theta_{Q,0}; x, y)\| \\ &\leq \frac{1 + \log(T+2\kappa)}{m_1} \sup_{(x,y) \in S_Q} \|\nabla \ell(\theta_{Q,0}; x, y)\| \end{aligned} \tag{13}$$

where the third step is due to the co-coercivity of the gradient of the convex and smooth functions:

$$\langle \nabla \ell(\theta_{Q,t}; x_t, y_t) - \nabla \ell(\theta_{Q,0}; x_t, y_t), \theta_{Q,t} - \theta_{Q,0} \rangle \geq \frac{1}{m_2} \|\nabla \ell(\theta_{Q,t}; x_t, y_t) - \nabla \ell(\theta_{Q,0}; x_t, y_t)\|^2.$$

Hence we can bound  $\|\theta_{Q,t}\|$  as

$$\begin{aligned} \|\theta_{Q,t}\| &\leq \|\theta_{Q,t} - \theta_{Q,0}\| + \|\theta_{Q,0}\| \\ &\leq \frac{1 + \log(T+2\kappa)}{m_1} \sup_{(x,y) \in S_Q} \|\nabla \ell(\theta_{Q,0}; x, y)\|. \end{aligned}$$

Hence we can compute sub-Gaussian parameter. By the definition of  $\hat{G}_\theta$

$$\left\| \nabla \ell(\theta_{Q,t}; x_t, y_t) - \nabla \hat{R}_Q(\theta_{Q,t}) \right\| \leq 2 \sup_{(x,y) \in S_Q} \|\nabla \ell(\theta_{Q,t}; x, y)\| \leq 2\hat{G}_\theta$$

According to Proposition 2, we know  $\left\| \nabla \ell(\theta_{Q,t}; x_t, y_t) - \nabla \hat{R}_Q(\theta_{Q,t}) \right\|$  is  $\hat{G}_\theta^2$  sub-Gaussian.

Now, we evoke the result from Theorem 3.7 from [27] that if the gradient noise is  $\hat{G}_\theta^2$  sub-Gaussian, then with our choice of  $\alpha_t$ , with probability at least  $1 - \tau$  it holds for any integer  $t > 0$  that

$$\hat{R}_Q(\theta_{Q,t}) - \hat{R}_Q(\hat{\theta}_Q) \leq \frac{m_1(1 + 2\kappa_Q)\|\hat{\theta}_Q\|^2}{t + 2\kappa} + \frac{6\hat{G}_\theta^2 \log(2/\tau)(\log t + 1)}{m_1(t + 2\kappa)}.$$

We further bound  $\|\hat{\theta}_Q\|^2$  as

$$\begin{aligned} \|\hat{\theta}_Q\|^2 &\leq 2\|\hat{\theta}_Q - \theta_{Q,0}\|^2 + 2\|\theta_{Q,0}\|^2 \\ &\leq \frac{4}{m_1}(\hat{R}_Q(\theta_{Q,0}) - \hat{R}_Q(\hat{\theta}_Q)) + 2\|\theta_{Q,0}\|^2 \\ &\leq \frac{4}{m_1}(\hat{R}_Q(\theta_{Q,0}) - \min_{\theta \in \mathbb{R}^D} \hat{R}_Q(\theta)) + 2\|\theta_{Q,0}\|^2 \\ &\leq \frac{4}{m_1} \cdot \frac{1}{2m_1} \left\| \nabla \hat{R}_Q(\theta_{Q,0}) \right\|^2 + 2\|\theta_{Q,0}\|^2 \end{aligned}$$

which concludes the proof.  $\square$

### 13.1 Proof of Theorem 4

*Proof.* The proof is almost identical to that of Theorem 2. In Section 12.2, choosing  $C_{PQ} = m_1(1 + 2\kappa)(\frac{2}{m_1^2}\|\nabla \hat{R}_Q(\theta_{Q,0})\|^2 + 2\|\theta_{Q,0}\|^2) + \frac{6\hat{G}_\theta^2 \log(2/\tau)}{m_1}$  and plugging in  $\tilde{g}(\theta) = \hat{R}_Q(\theta) - \hat{R}_Q(\theta_{Q,T}) - 2\epsilon_Q$  will conclude the proof.  $\square$

### 13.2 Proof of Proposition 1

*Proof.* By the standard Rademacher complexity analysis (see [25]) we know:

$$\sup_{h \in \mathcal{H}} |R_\mu(\theta) - \hat{R}_\mu(\theta)| \leq 2\mathcal{R}_n(\ell \circ \mathcal{H}) + M_\ell \sqrt{\frac{\log \frac{2}{\tau}}{2n_\mu}}.$$

Plugging in the upper bound of  $\mathcal{R}_n(\ell \circ \mathcal{H})$  from Assumption 5 concludes the proof.  $\square$

### 13.3 Proof of Corollary 1

*Proof.* First, since  $\hat{\theta}_{PQ} \in \{\theta : \hat{R}_Q(\theta) - \hat{R}_Q(\hat{\theta}_Q) \leq 3\epsilon_Q\}$ , then by Proposition 1 and our choice of  $\epsilon_Q$  we know  $\mathcal{E}_Q(\hat{\theta}_{PQ}) \leq 5\epsilon_Q$  with probability at least  $1 - \tau$  over the randomness of  $S_Q$ .

Then we discuss by cases. If  $\theta_P^* \in \{\theta : \hat{R}_Q(\theta) - \hat{R}_Q(\hat{\theta}_Q) \leq 3\epsilon_Q\}$ , then since  $\hat{R}_P(\hat{\theta}_{PQ}) - \hat{R}_P(\tilde{\theta}_{PQ}) \leq \epsilon_P$ , by Proposition 1 and our choice of  $\epsilon_P$  we know with probability at least  $1 - 2\tau$  over the randomness of  $S_P$  and Algorithm 3,

$$\begin{aligned} \mathcal{E}_P(\hat{\theta}_{PQ}) &= R_P(\hat{\theta}_{PQ}) - R_P(\theta_P^*) \\ &= R_P(\hat{\theta}_{PQ}) - \hat{R}_P(\hat{\theta}_{PQ}) + \hat{R}_P(\hat{\theta}_{PQ}) - \hat{R}_P(\tilde{\theta}_{PQ}) + \underbrace{\hat{R}_P(\tilde{\theta}_{PQ}) - \hat{R}_P(\theta_P^*)}_{\leq 0} \\ &\quad + \hat{R}_P(\theta_P^*) - R_P(\theta_P^*) \leq 3\epsilon_P. \end{aligned}$$

Hence  $\mathcal{E}_Q(\hat{\theta}_{PQ}) \leq \delta(3\epsilon_P)$ .

If  $\theta_P^* \notin \{\theta : \hat{R}_Q(\theta) - \hat{R}_Q(\hat{\theta}_Q) \leq 3\epsilon_Q\}$ , then we know  $\mathcal{E}_Q(\theta_P^*) \geq \epsilon_Q$  with probability at least  $1 - \tau$  over the randomness of  $S_Q$ . This is because for any  $\theta$  such that  $\mathcal{E}_Q(\theta) \leq \epsilon_Q$ , it must be in the set  $\{\theta : \hat{R}_Q(\theta) - \hat{R}_Q(\hat{\theta}_Q) \leq 3\epsilon_Q\}$ . To see this, note that

$$\hat{\mathcal{E}}_Q(\theta) \leq \mathcal{E}_Q(\theta) + 2\epsilon_Q \leq 3\epsilon_Q.$$

636 Hence we know

$$\mathcal{E}_Q(\hat{\theta}_{PQ}) \leq 5\epsilon_Q \leq 5\mathcal{E}_Q(\theta_P^*) \leq 5\delta(\epsilon_P).$$

637 Putting piece together we have with probability at least  $1 - 3\tau$ , it holds that

$$\mathcal{E}_Q(\hat{\theta}_{PQ}) \leq 5 \min \{ \epsilon_Q, \delta(3\epsilon_P) \}.$$

638

□

## NeurIPS Paper Checklist

### 1. Claims

Question: Do the main claims made in the abstract and introduction accurately reflect the paper's contributions and scope?

Answer: [\[Yes\]](#)

Justification: We clearly claim our contributions and scope in both abstract and introduction.

Guidelines:

- The answer NA means that the abstract and introduction do not include the claims made in the paper.
- The abstract and/or introduction should clearly state the claims made, including the contributions made in the paper and important assumptions and limitations. A No or NA answer to this question will not be perceived well by the reviewers.
- The claims made should match theoretical and experimental results, and reflect how much the results can be expected to generalize to other settings.
- It is fine to include aspirational goals as motivation as long as it is clear that these goals are not attained by the paper.

### 2. Limitations

Question: Does the paper discuss the limitations of the work performed by the authors?

Answer: [\[Yes\]](#)

Justification: We point out that our theoretical results are for convex functions which can be a potential limitation.

Guidelines:

- The answer NA means that the paper has no limitation while the answer No means that the paper has limitations, but those are not discussed in the paper.
- The authors are encouraged to create a separate "Limitations" section in their paper.
- The paper should point out any strong assumptions and how robust the results are to violations of these assumptions (e.g., independence assumptions, noiseless settings, model well-specification, asymptotic approximations only holding locally). The authors should reflect on how these assumptions might be violated in practice and what the implications would be.
- The authors should reflect on the scope of the claims made, e.g., if the approach was only tested on a few datasets or with a few runs. In general, empirical results often depend on implicit assumptions, which should be articulated.
- The authors should reflect on the factors that influence the performance of the approach. For example, a facial recognition algorithm may perform poorly when image resolution is low or images are taken in low lighting. Or a speech-to-text system might not be used reliably to provide closed captions for online lectures because it fails to handle technical jargon.
- The authors should discuss the computational efficiency of the proposed algorithms and how they scale with dataset size.
- If applicable, the authors should discuss possible limitations of their approach to address problems of privacy and fairness.
- While the authors might fear that complete honesty about limitations might be used by reviewers as grounds for rejection, a worse outcome might be that reviewers discover limitations that aren't acknowledged in the paper. The authors should use their best judgment and recognize that individual actions in favor of transparency play an important role in developing norms that preserve the integrity of the community. Reviewers will be specifically instructed to not penalize honesty concerning limitations.

### 3. Theory assumptions and proofs

Question: For each theoretical result, does the paper provide the full set of assumptions and a complete (and correct) proof?

Answer: [\[Yes\]](#)

Justification: In our Theorems, we clearly list the assumptions.

Guidelines:

- The answer NA means that the paper does not include theoretical results.
- All the theorems, formulas, and proofs in the paper should be numbered and cross-referenced.
- All assumptions should be clearly stated or referenced in the statement of any theorems.
- The proofs can either appear in the main paper or the supplemental material, but if they appear in the supplemental material, the authors are encouraged to provide a short proof sketch to provide intuition.
- Inversely, any informal proof provided in the core of the paper should be complemented by formal proofs provided in appendix or supplemental material.
- Theorems and Lemmas that the proof relies upon should be properly referenced.

#### 4. Experimental result reproducibility

Question: Does the paper fully disclose all the information needed to reproduce the main experimental results of the paper to the extent that it affects the main claims and/or conclusions of the paper (regardless of whether the code and data are provided or not)?

Answer: [\[Yes\]](#)

Justification: We report clear experiments setup in the Experiment section.

Guidelines:

- The answer NA means that the paper does not include experiments.
- If the paper includes experiments, a No answer to this question will not be perceived well by the reviewers: Making the paper reproducible is important, regardless of whether the code and data are provided or not.
- If the contribution is a dataset and/or model, the authors should describe the steps taken to make their results reproducible or verifiable.
- Depending on the contribution, reproducibility can be accomplished in various ways. For example, if the contribution is a novel architecture, describing the architecture fully might suffice, or if the contribution is a specific model and empirical evaluation, it may be necessary to either make it possible for others to replicate the model with the same dataset, or provide access to the model. In general, releasing code and data is often one good way to accomplish this, but reproducibility can also be provided via detailed instructions for how to replicate the results, access to a hosted model (e.g., in the case of a large language model), releasing of a model checkpoint, or other means that are appropriate to the research performed.
- While NeurIPS does not require releasing code, the conference does require all submissions to provide some reasonable avenue for reproducibility, which may depend on the nature of the contribution. For example
  - (a) If the contribution is primarily a new algorithm, the paper should make it clear how to reproduce that algorithm.
  - (b) If the contribution is primarily a new model architecture, the paper should describe the architecture clearly and fully.
  - (c) If the contribution is a new model (e.g., a large language model), then there should either be a way to access this model for reproducing the results or a way to reproduce the model (e.g., with an open-source dataset or instructions for how to construct the dataset).
  - (d) We recognize that reproducibility may be tricky in some cases, in which case authors are welcome to describe the particular way they provide for reproducibility. In the case of closed-source models, it may be that access to the model is limited in some way (e.g., to registered users), but it should be possible for other researchers to have some path to reproducing or verifying the results.

#### 5. Open access to data and code

Question: Does the paper provide open access to the data and code, with sufficient instructions to faithfully reproduce the main experimental results, as described in supplemental material?



Answer: [No]

Justification: We do not make our code public at this moment. The data used in the experiments are open source data.

Guidelines:

- The answer NA means that paper does not include experiments requiring code.
- Please see the NeurIPS code and data submission guidelines (<https://nips.cc/public/guides/CodeSubmissionPolicy>) for more details.
- While we encourage the release of code and data, we understand that this might not be possible, so “No” is an acceptable answer. Papers cannot be rejected simply for not including code, unless this is central to the contribution (e.g., for a new open-source benchmark).
- The instructions should contain the exact command and environment needed to run to reproduce the results. See the NeurIPS code and data submission guidelines (<https://nips.cc/public/guides/CodeSubmissionPolicy>) for more details.
- The authors should provide instructions on data access and preparation, including how to access the raw data, preprocessed data, intermediate data, and generated data, etc.
- The authors should provide scripts to reproduce all experimental results for the new proposed method and baselines. If only a subset of experiments are reproducible, they should state which ones are omitted from the script and why.
- At submission time, to preserve anonymity, the authors should release anonymized versions (if applicable).
- Providing as much information as possible in supplemental material (appended to the paper) is recommended, but including URLs to data and code is permitted.

## 6. Experimental setting/details

Question: Does the paper specify all the training and test details (e.g., data splits, hyper-parameters, how they were chosen, type of optimizer, etc.) necessary to understand the results?

Answer: [Yes]

Justification: We discuss this in the Experiments section.

Guidelines:

- The answer NA means that the paper does not include experiments.
- The experimental setting should be presented in the core of the paper to a level of detail that is necessary to appreciate the results and make sense of them.
- The full details can be provided either with the code, in appendix, or as supplemental material.

## 7. Experiment statistical significance

Question: Does the paper report error bars suitably and correctly defined or other appropriate information about the statistical significance of the experiments?

Answer: [Yes]

Justification: We report them in the Experiments section.

Guidelines:

- The answer NA means that the paper does not include experiments.
- The authors should answer "Yes" if the results are accompanied by error bars, confidence intervals, or statistical significance tests, at least for the experiments that support the main claims of the paper.
- The factors of variability that the error bars are capturing should be clearly stated (for example, train/test split, initialization, random drawing of some parameter, or overall run with given experimental conditions).
- The method for calculating the error bars should be explained (closed form formula, call to a library function, bootstrap, etc.)
- The assumptions made should be given (e.g., Normally distributed errors).

- It should be clear whether the error bar is the standard deviation or the standard error of the mean.
- It is OK to report 1-sigma error bars, but one should state it. The authors should preferably report a 2-sigma error bar than state that they have a 96% CI, if the hypothesis of Normality of errors is not verified.
- For asymmetric distributions, the authors should be careful not to show in tables or figures symmetric error bars that would yield results that are out of range (e.g. negative error rates).
- If error bars are reported in tables or plots, The authors should explain in the text how they were calculated and reference the corresponding figures or tables in the text.

## 8. Experiments compute resources

Question: For each experiment, does the paper provide sufficient information on the computer resources (type of compute workers, memory, time of execution) needed to reproduce the experiments?

Answer: [Yes]

Justification: We report the compute resources in the Experiments section.

Guidelines:

- The answer NA means that the paper does not include experiments.
- The paper should indicate the type of compute workers CPU or GPU, internal cluster, or cloud provider, including relevant memory and storage.
- The paper should provide the amount of compute required for each of the individual experimental runs as well as estimate the total compute.
- The paper should disclose whether the full research project required more compute than the experiments reported in the paper (e.g., preliminary or failed experiments that didn't make it into the paper).

## 9. Code of ethics

Question: Does the research conducted in the paper conform, in every respect, with the NeurIPS Code of Ethics <https://neurips.cc/public/EthicsGuidelines>?

Answer: [Yes]

Justification: This paper conforms, in every respect, with the NeurIPS Code of Ethic.

Guidelines:

- The answer NA means that the authors have not reviewed the NeurIPS Code of Ethics.
- If the authors answer No, they should explain the special circumstances that require a deviation from the Code of Ethics.
- The authors should make sure to preserve anonymity (e.g., if there is a special consideration due to laws or regulations in their jurisdiction).

## 10. Broader impacts

Question: Does the paper discuss both potential positive societal impacts and negative societal impacts of the work performed?

Answer: [No]

Justification: This is a theoretical paper so we are not aware of any societal impacts of it.

Guidelines:

- The answer NA means that there is no societal impact of the work performed.
- If the authors answer NA or No, they should explain why their work has no societal impact or why the paper does not address societal impact.
- Examples of negative societal impacts include potential malicious or unintended uses (e.g., disinformation, generating fake profiles, surveillance), fairness considerations (e.g., deployment of technologies that could make decisions that unfairly impact specific groups), privacy considerations, and security considerations.

- The conference expects that many papers will be foundational research and not tied to particular applications, let alone deployments. However, if there is a direct path to any negative applications, the authors should point it out. For example, it is legitimate to point out that an improvement in the quality of generative models could be used to generate deepfakes for disinformation. On the other hand, it is not needed to point out that a generic algorithm for optimizing neural networks could enable people to train models that generate Deepfakes faster.
- The authors should consider possible harms that could arise when the technology is being used as intended and functioning correctly, harms that could arise when the technology is being used as intended but gives incorrect results, and harms following from (intentional or unintentional) misuse of the technology.
- If there are negative societal impacts, the authors could also discuss possible mitigation strategies (e.g., gated release of models, providing defenses in addition to attacks, mechanisms for monitoring misuse, mechanisms to monitor how a system learns from feedback over time, improving the efficiency and accessibility of ML).

## 11. Safeguards

Question: Does the paper describe safeguards that have been put in place for responsible release of data or models that have a high risk for misuse (e.g., pretrained language models, image generators, or scraped datasets)?

Answer: [No]

Justification: This is a theoretical paper so we are not aware of any risk for misuse.

Guidelines:

- The answer NA means that the paper poses no such risks.
- Released models that have a high risk for misuse or dual-use should be released with necessary safeguards to allow for controlled use of the model, for example by requiring that users adhere to usage guidelines or restrictions to access the model or implementing safety filters.
- Datasets that have been scraped from the Internet could pose safety risks. The authors should describe how they avoided releasing unsafe images.
- We recognize that providing effective safeguards is challenging, and many papers do not require this, but we encourage authors to take this into account and make a best faith effort.

## 12. Licenses for existing assets

Question: Are the creators or original owners of assets (e.g., code, data, models), used in the paper, properly credited and are the license and terms of use explicitly mentioned and properly respected?

Answer: [Yes]

Justification: We cite the references for the datasets used in the experiments.

Guidelines:

- The answer NA means that the paper does not use existing assets.
- The authors should cite the original paper that produced the code package or dataset.
- The authors should state which version of the asset is used and, if possible, include a URL.
- The name of the license (e.g., CC-BY 4.0) should be included for each asset.
- For scraped data from a particular source (e.g., website), the copyright and terms of service of that source should be provided.
- If assets are released, the license, copyright information, and terms of use in the package should be provided. For popular datasets, [paperswithcode.com/datasets](https://paperswithcode.com/datasets) has curated licenses for some datasets. Their licensing guide can help determine the license of a dataset.
- For existing datasets that are re-packaged, both the original license and the license of the derived asset (if it has changed) should be provided.

- 897                   • If this information is not available online, the authors are encouraged to reach out to  
898                   the asset’s creators.

899   **13. New assets**

900   Question: Are new assets introduced in the paper well documented and is the documentation  
901   provided alongside the assets?

902   Answer: [NA]

903   Justification: We do not release new assets.

904   Guidelines:

- 905                   • The answer NA means that the paper does not release new assets.  
906                   • Researchers should communicate the details of the dataset/code/model as part of their  
907                   submissions via structured templates. This includes details about training, license,  
908                   limitations, etc.  
909                   • The paper should discuss whether and how consent was obtained from people whose  
910                   asset is used.  
911                   • At submission time, remember to anonymize your assets (if applicable). You can either  
912                   create an anonymized URL or include an anonymized zip file.

913   **14. Crowdsourcing and research with human subjects**

914   Question: For crowdsourcing experiments and research with human subjects, does the paper  
915   include the full text of instructions given to participants and screenshots, if applicable, as  
916   well as details about compensation (if any)?

917   Answer: [NA]

918   Justification: We do not have crowdsourcing experiments.

919   Guidelines:

- 920                   • The answer NA means that the paper does not involve crowdsourcing nor research with  
921                   human subjects.  
922                   • Including this information in the supplemental material is fine, but if the main contribu-  
923                   tion of the paper involves human subjects, then as much detail as possible should be  
924                   included in the main paper.  
925                   • According to the NeurIPS Code of Ethics, workers involved in data collection, curation,  
926                   or other labor should be paid at least the minimum wage in the country of the data  
927                   collector.

928   **15. Institutional review board (IRB) approvals or equivalent for research with human  
929   subjects**

930   Question: Does the paper describe potential risks incurred by study participants, whether  
931   such risks were disclosed to the subjects, and whether Institutional Review Board (IRB)  
932   approvals (or an equivalent approval/review based on the requirements of your country or  
933   institution) were obtained?

934   Answer: [NA]

935   Justification: The paper does not involve crowdsourcing nor research with human subjects.

936   Guidelines:

- 937                   • The answer NA means that the paper does not involve crowdsourcing nor research with  
938                   human subjects.  
939                   • Depending on the country in which research is conducted, IRB approval (or equivalent)  
940                   may be required for any human subjects research. If you obtained IRB approval, you  
941                   should clearly state this in the paper.  
942                   • We recognize that the procedures for this may vary significantly between institutions  
943                   and locations, and we expect authors to adhere to the NeurIPS Code of Ethics and the  
944                   guidelines for their institution.  
945                   • For initial submissions, do not include any information that would break anonymity (if  
946                   applicable), such as the institution conducting the review.

947   **16. Declaration of LLM usage**

948 Question: Does the paper describe the usage of LLMs if it is an important, original, or  
949 non-standard component of the core methods in this research? Note that if the LLM is used  
950 only for writing, editing, or formatting purposes and does not impact the core methodology,  
951 scientific rigorousness, or originality of the research, declaration is not required.

952 Answer: [NA]

953 Justification: We do not use LLM.

954 Guidelines:

- 955 • The answer NA means that the core method development in this research does not
- 956 involve LLMs as any important, original, or non-standard components.
- 957 • Please refer to our LLM policy (<https://neurips.cc/Conferences/2025/LLM>)
- 958 for what should or should not be described.
